# Supplementary material for: deCS: A Tool for Systematic Cell Type Annotations of Single-cell RNA Sequencing Data among Human Tissues
Source: PubMed Central journal article supplement — Genomics Proteomics Bioinformatics. 2022 Apr 22;21(2):370–84. doi: 10.1016/j.gpb.2022.04.001 (PMC10626171; doi:10.1016/j.gpb.2022.04.001), 2022-04-22

**A****BlueprintEncode**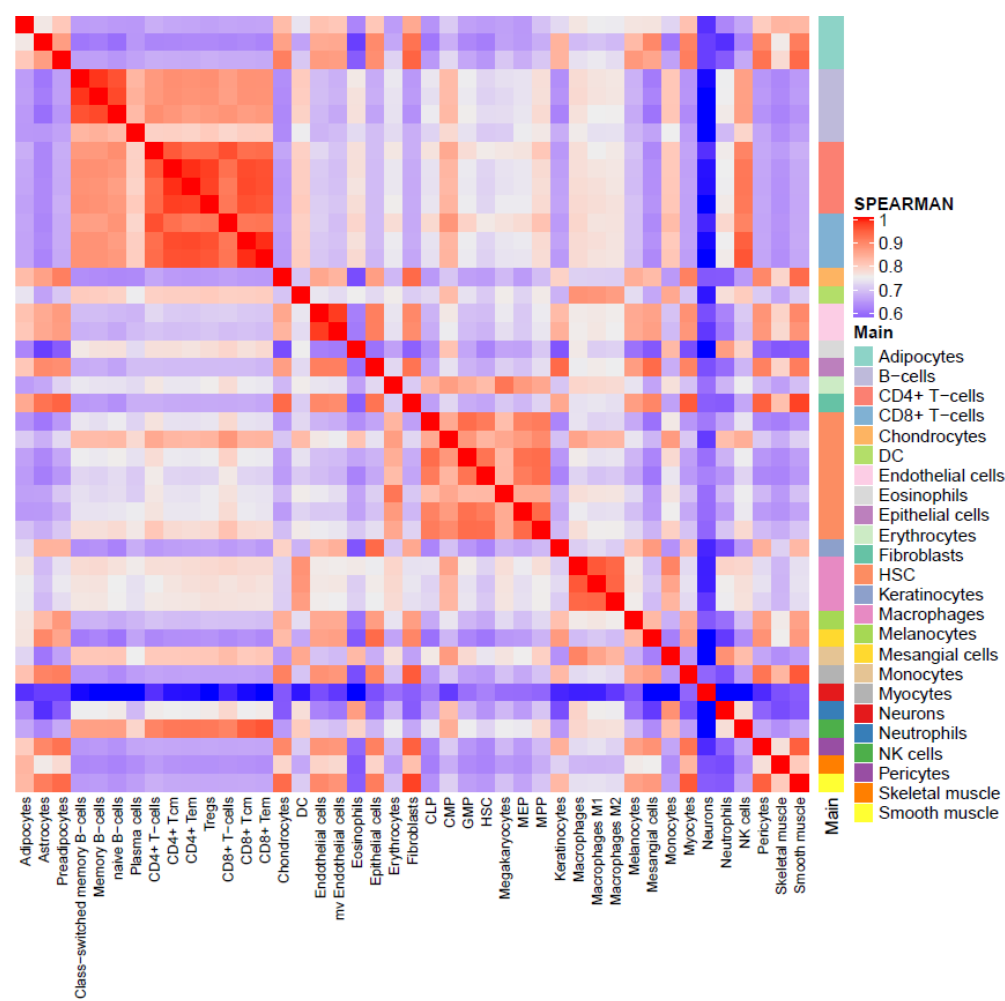**B****ImmuneCellExpression**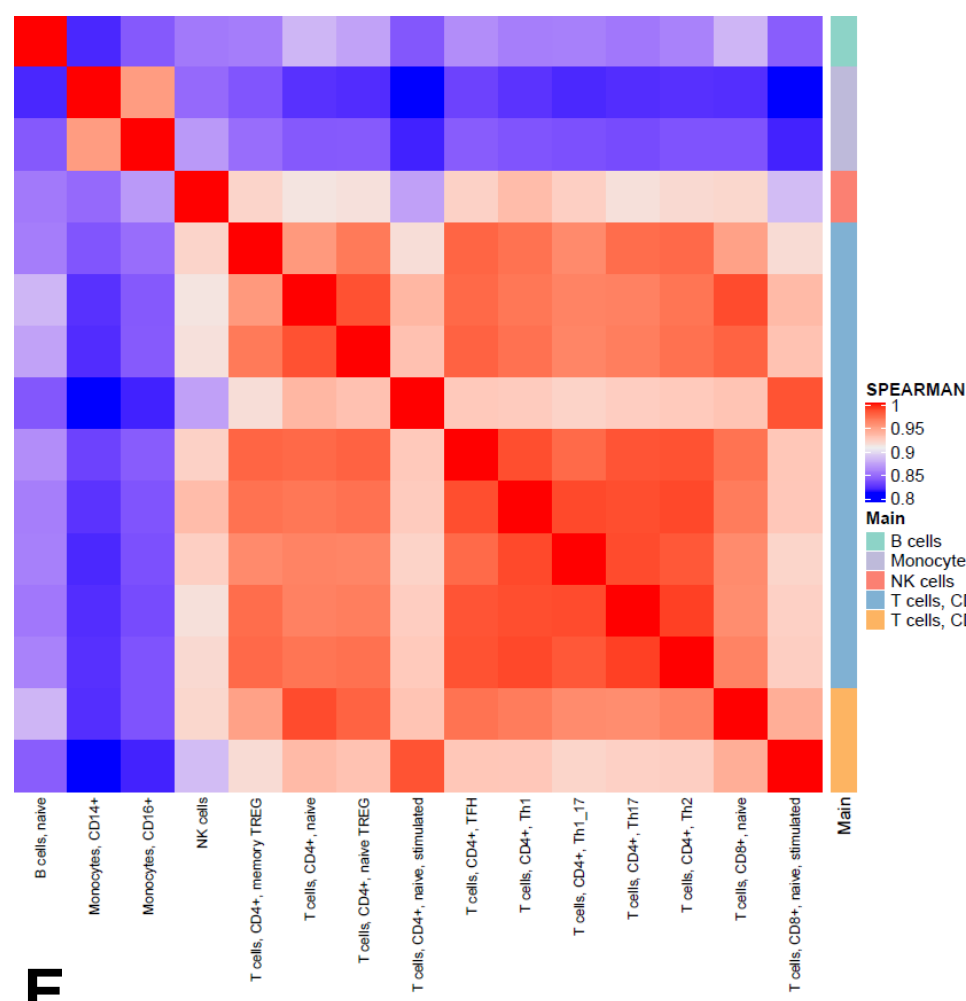**C****MonacolImmune**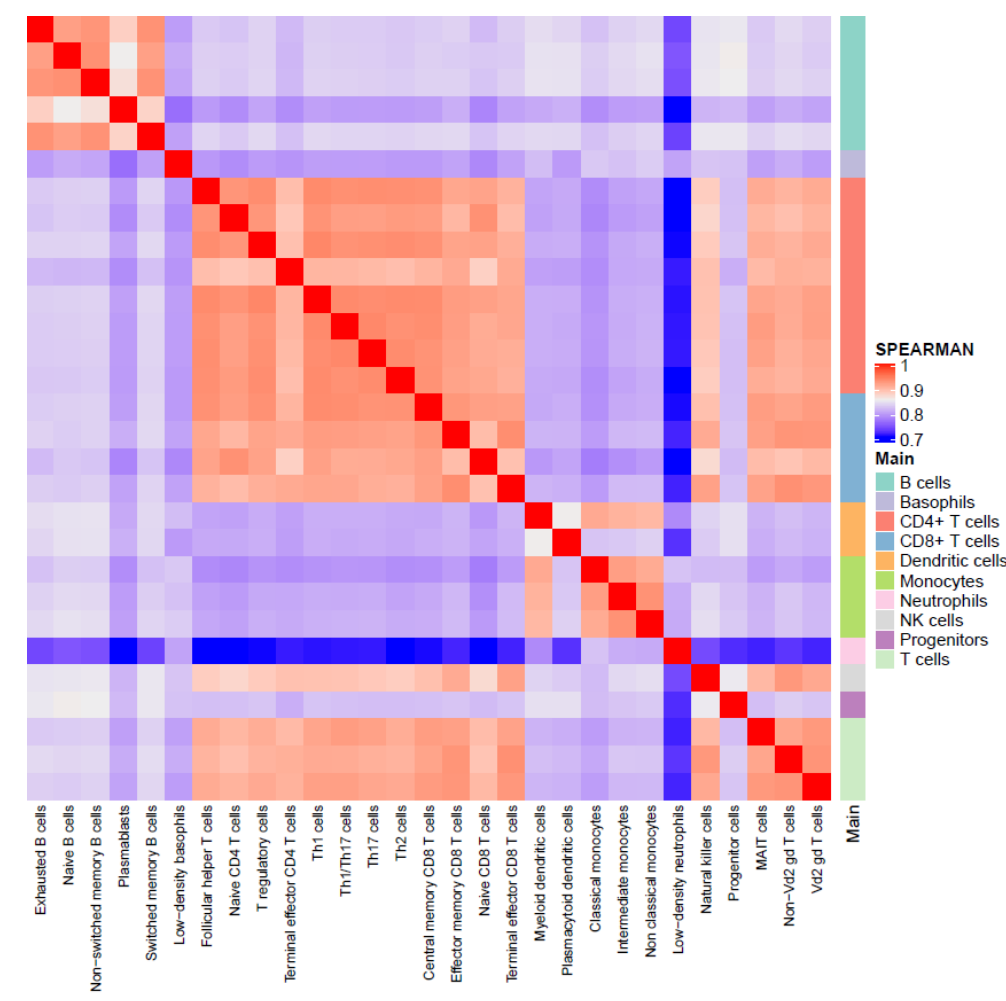**D**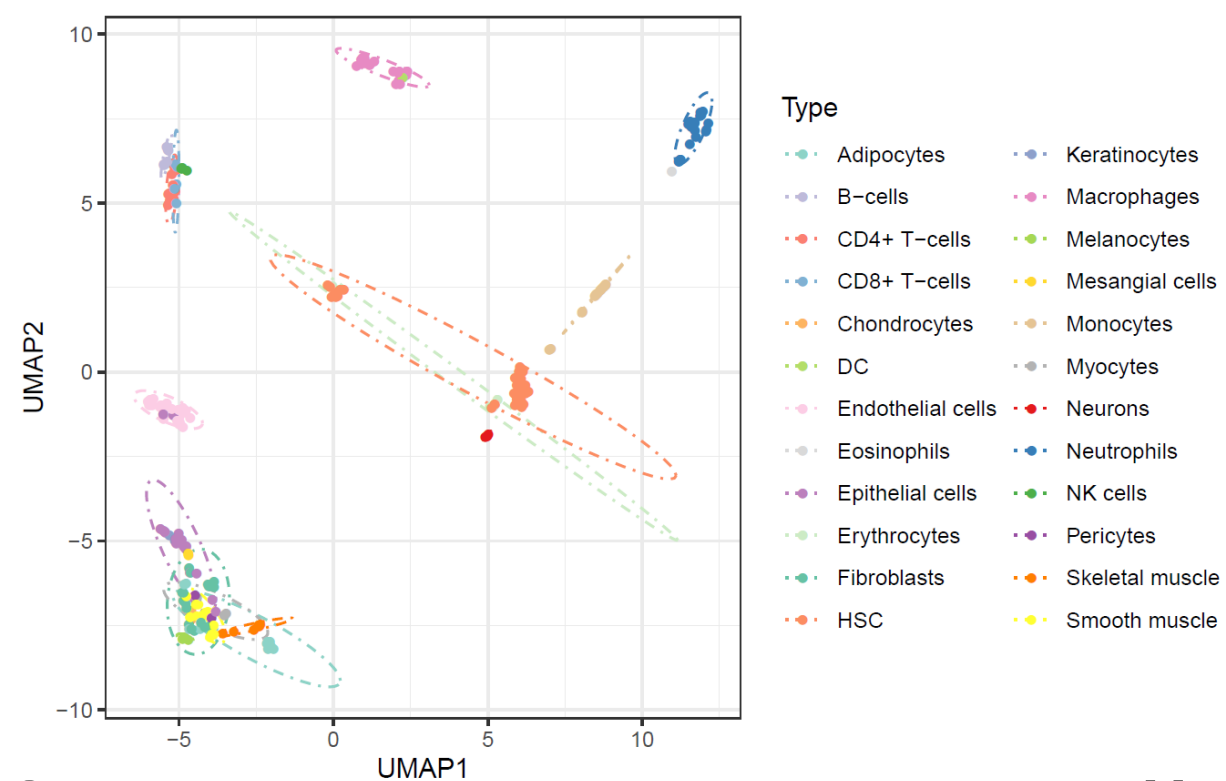**E**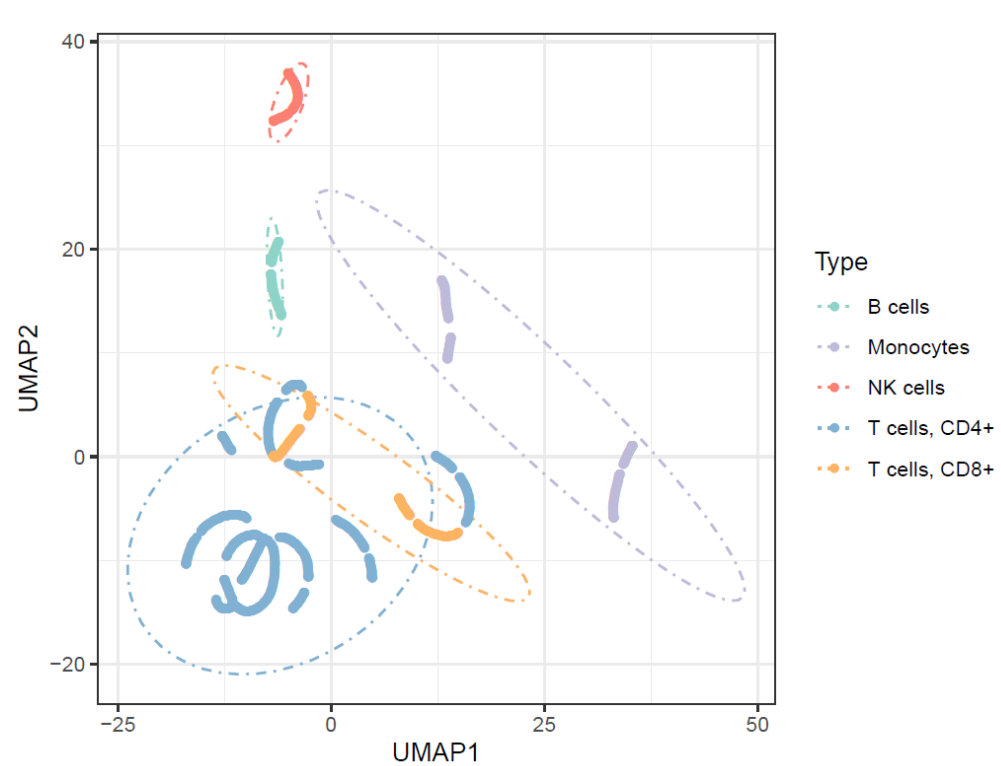**F**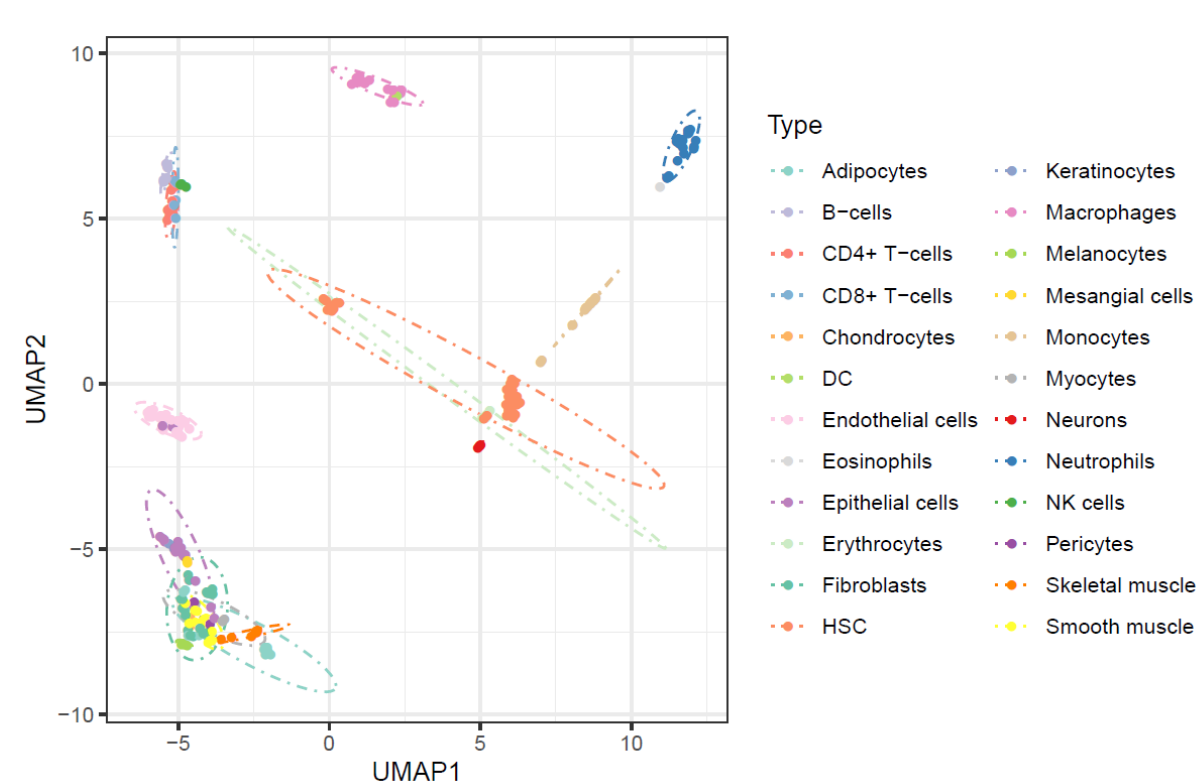**G**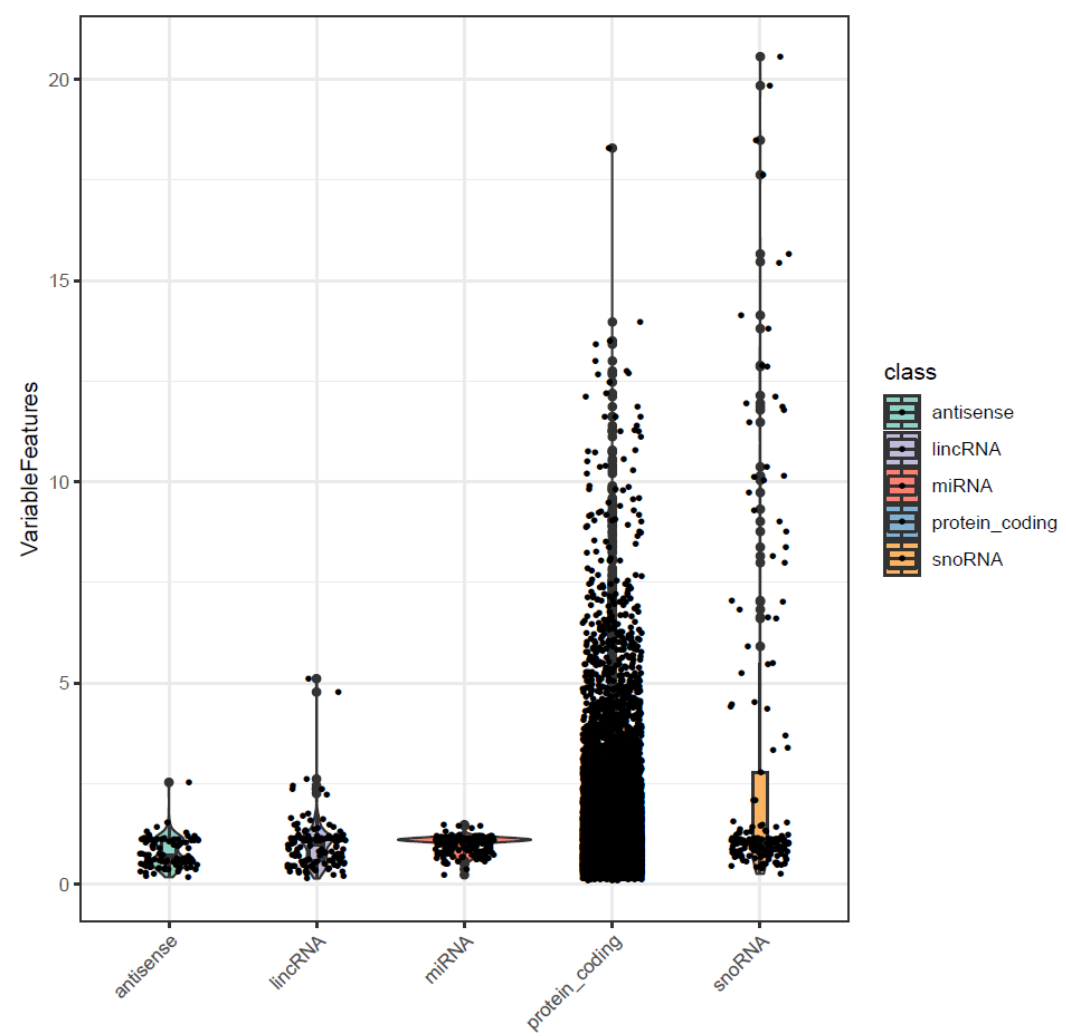**H**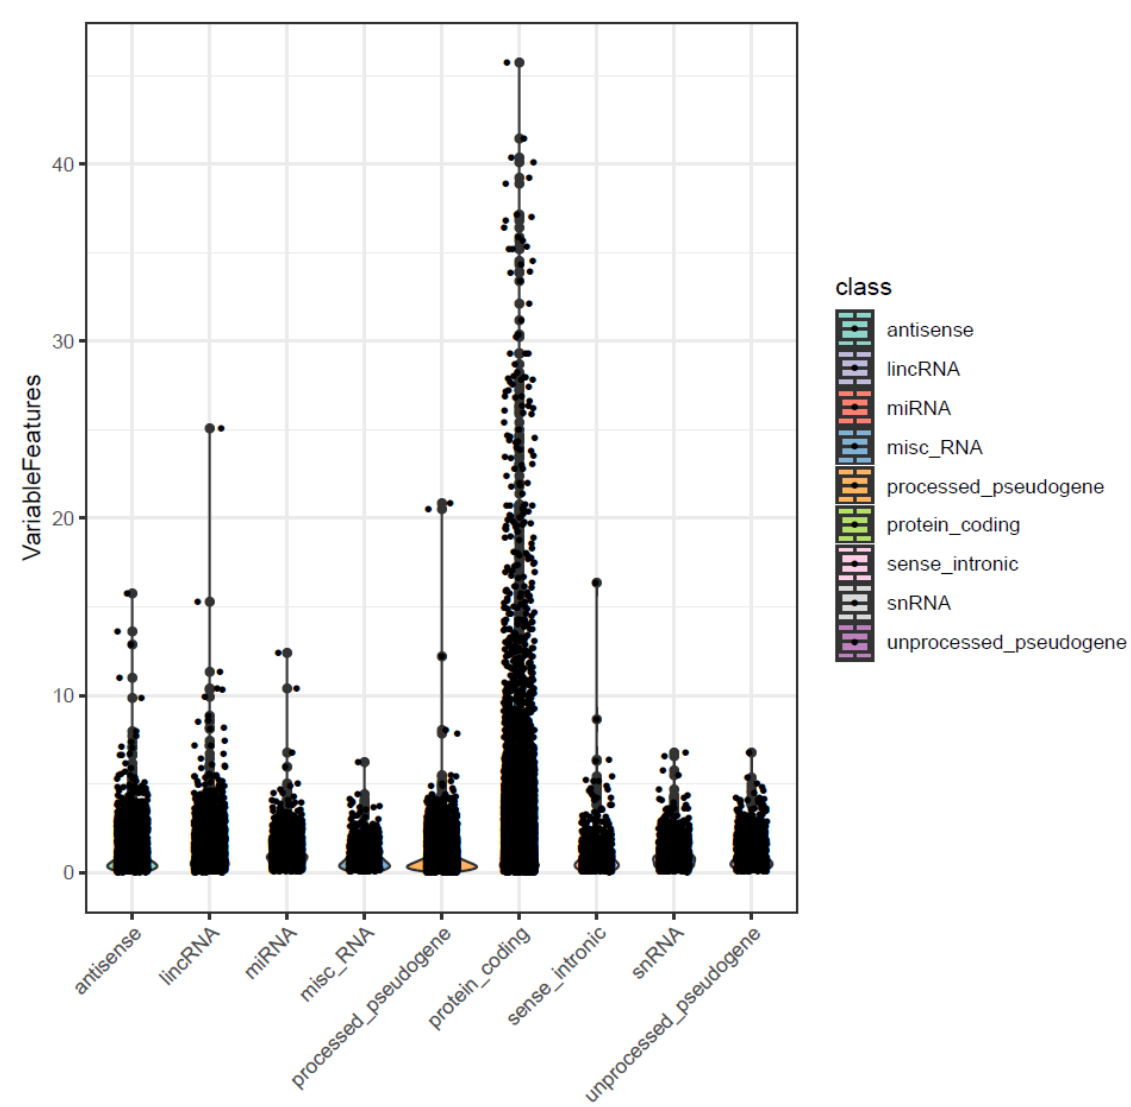**I**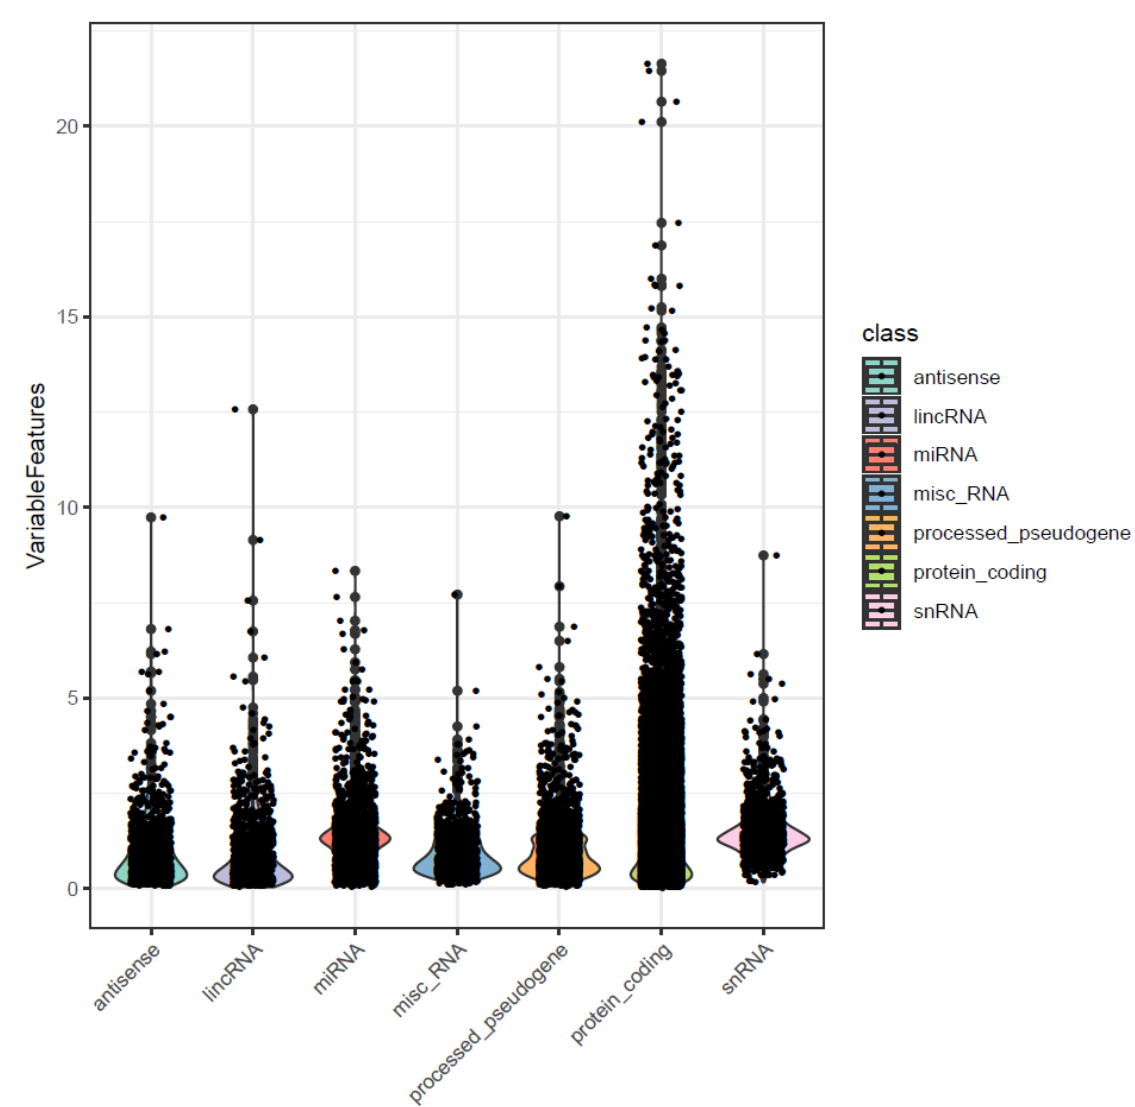

Supplement: mmc1.pdf [file mmc1.pdf]
