# Supplementary material for: deCS: A Tool for Systematic Cell Type Annotations of Single-cell RNA Sequencing Data among Human Tissues
Source: PubMed Central journal article supplement — Genomics Proteomics Bioinformatics. 2022 Apr 22;21(2):370–84. doi: 10.1016/j.gpb.2022.04.001 (PMC10626171; doi:10.1016/j.gpb.2022.04.001), 2022-04-22
Supplement: mmc7.pdf [file mmc7.pdf]

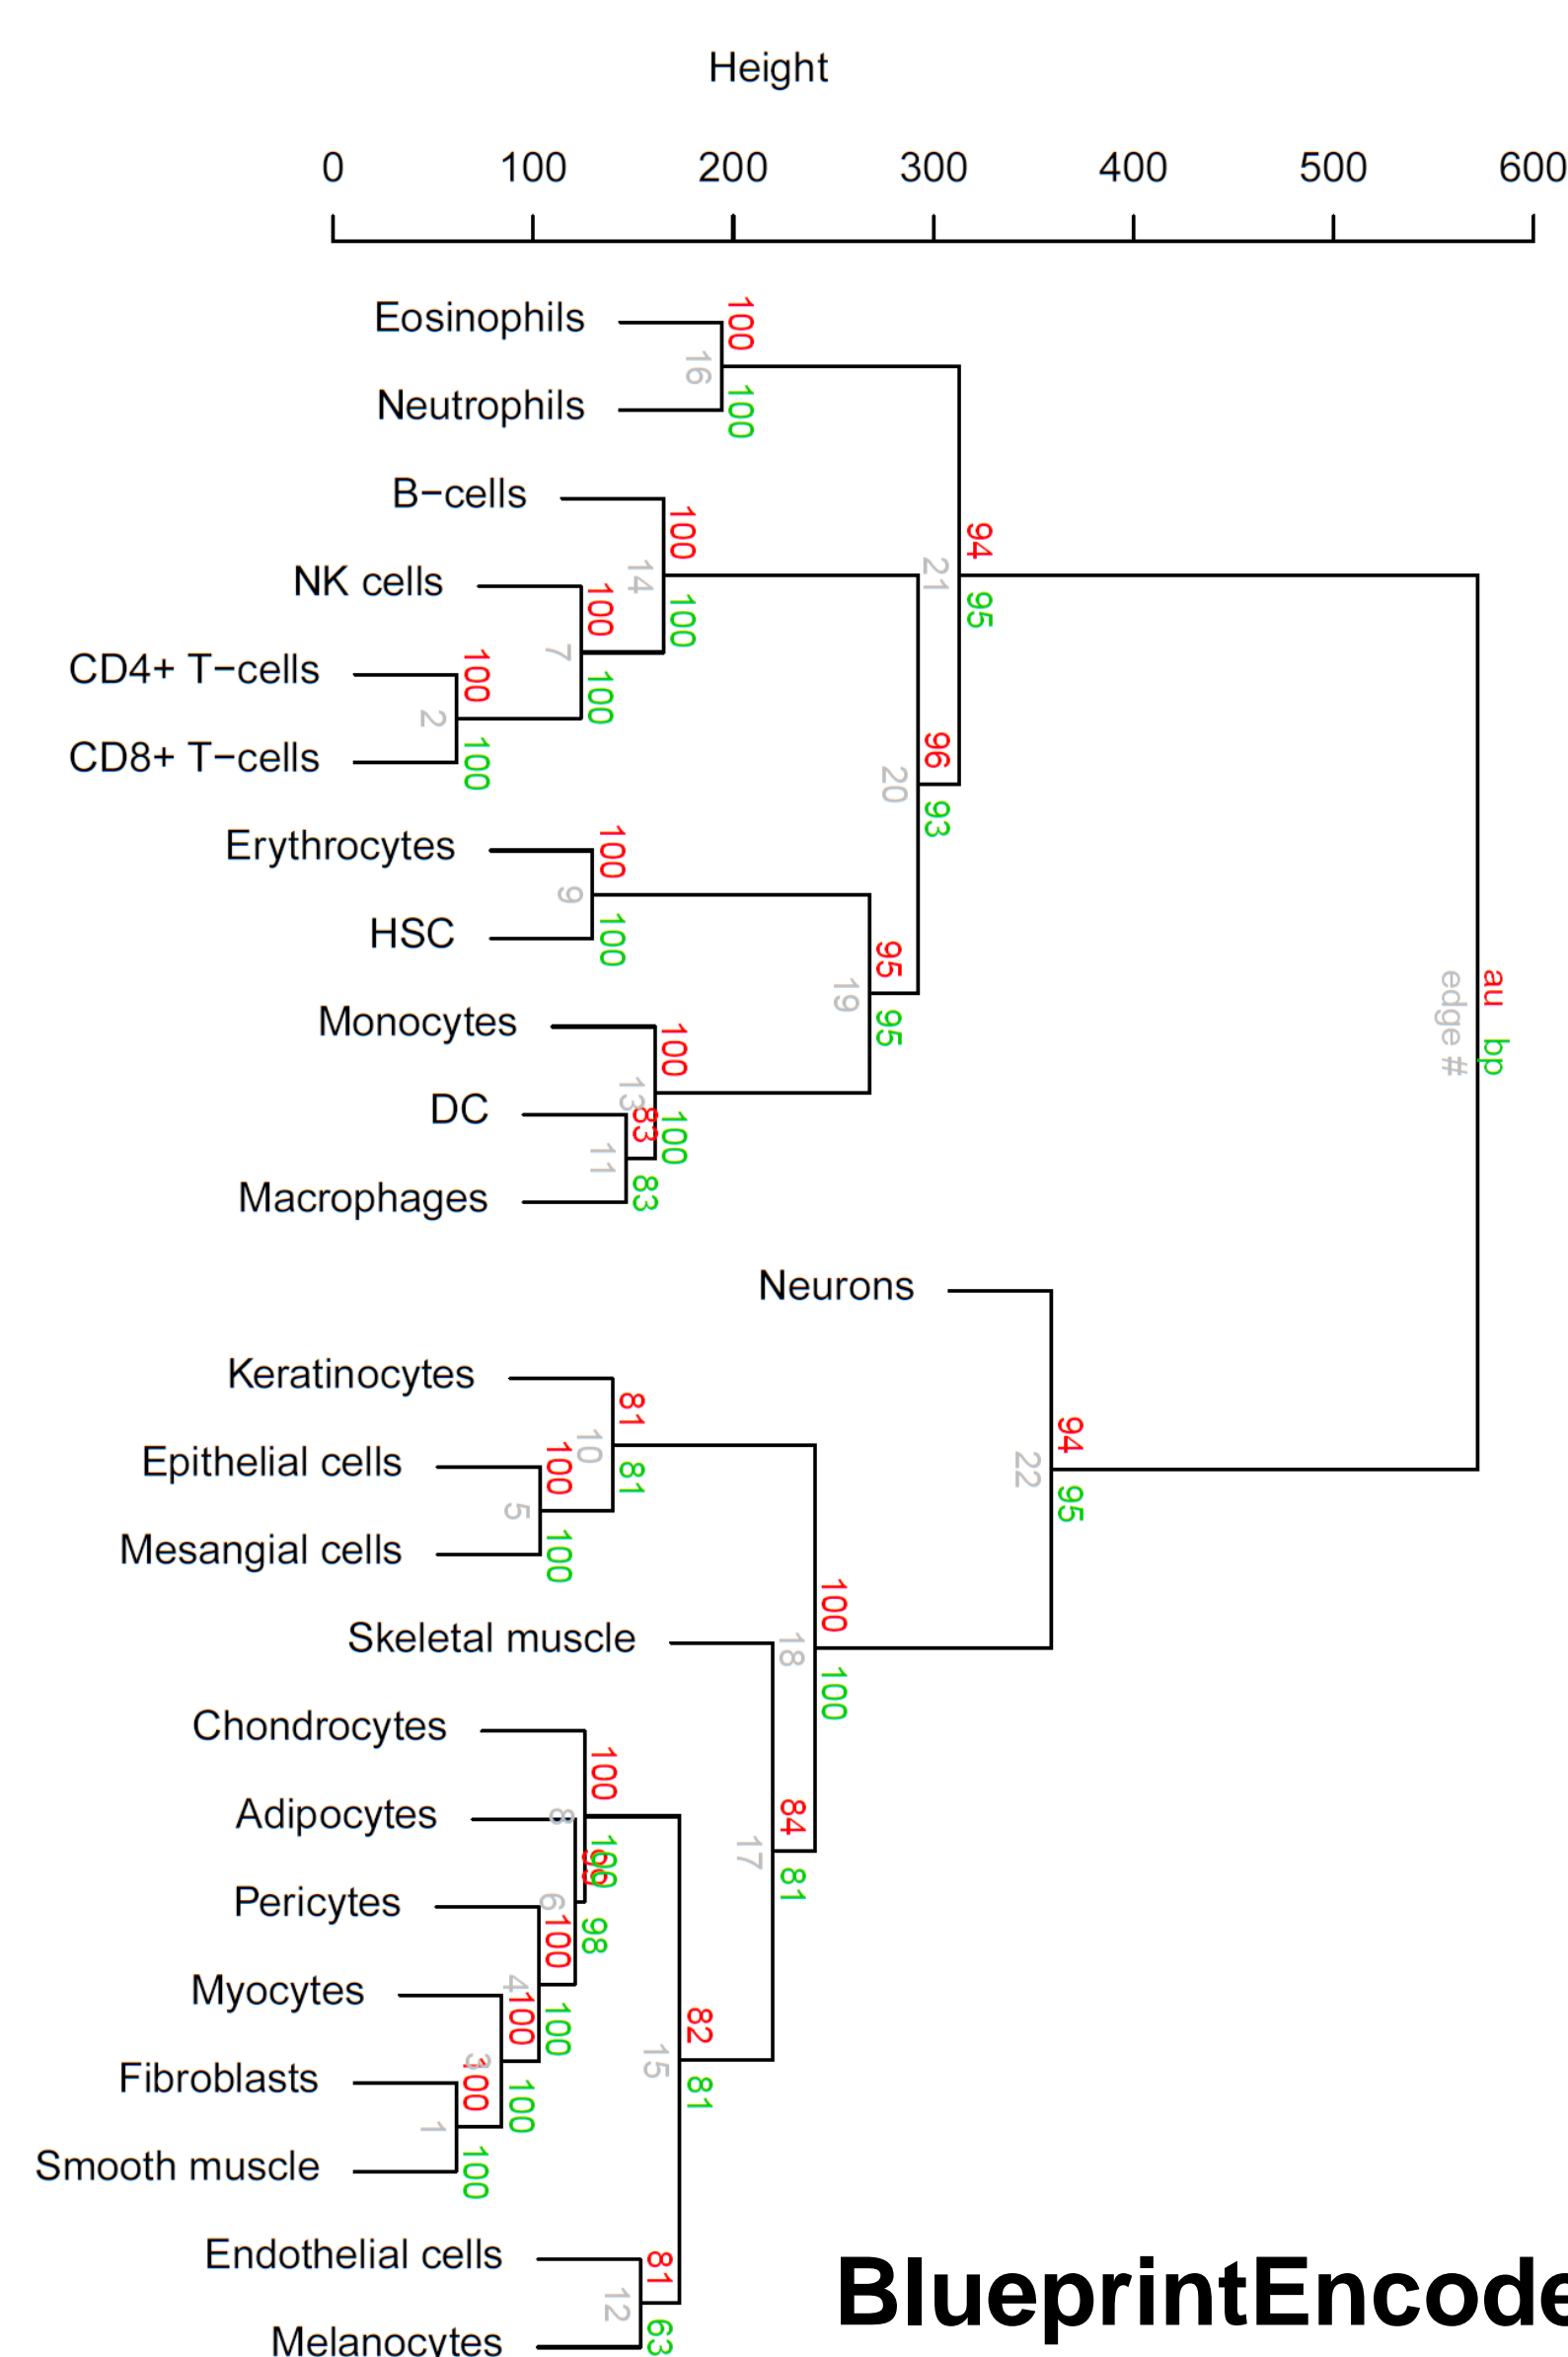

**BlueprintEncode (Main)**

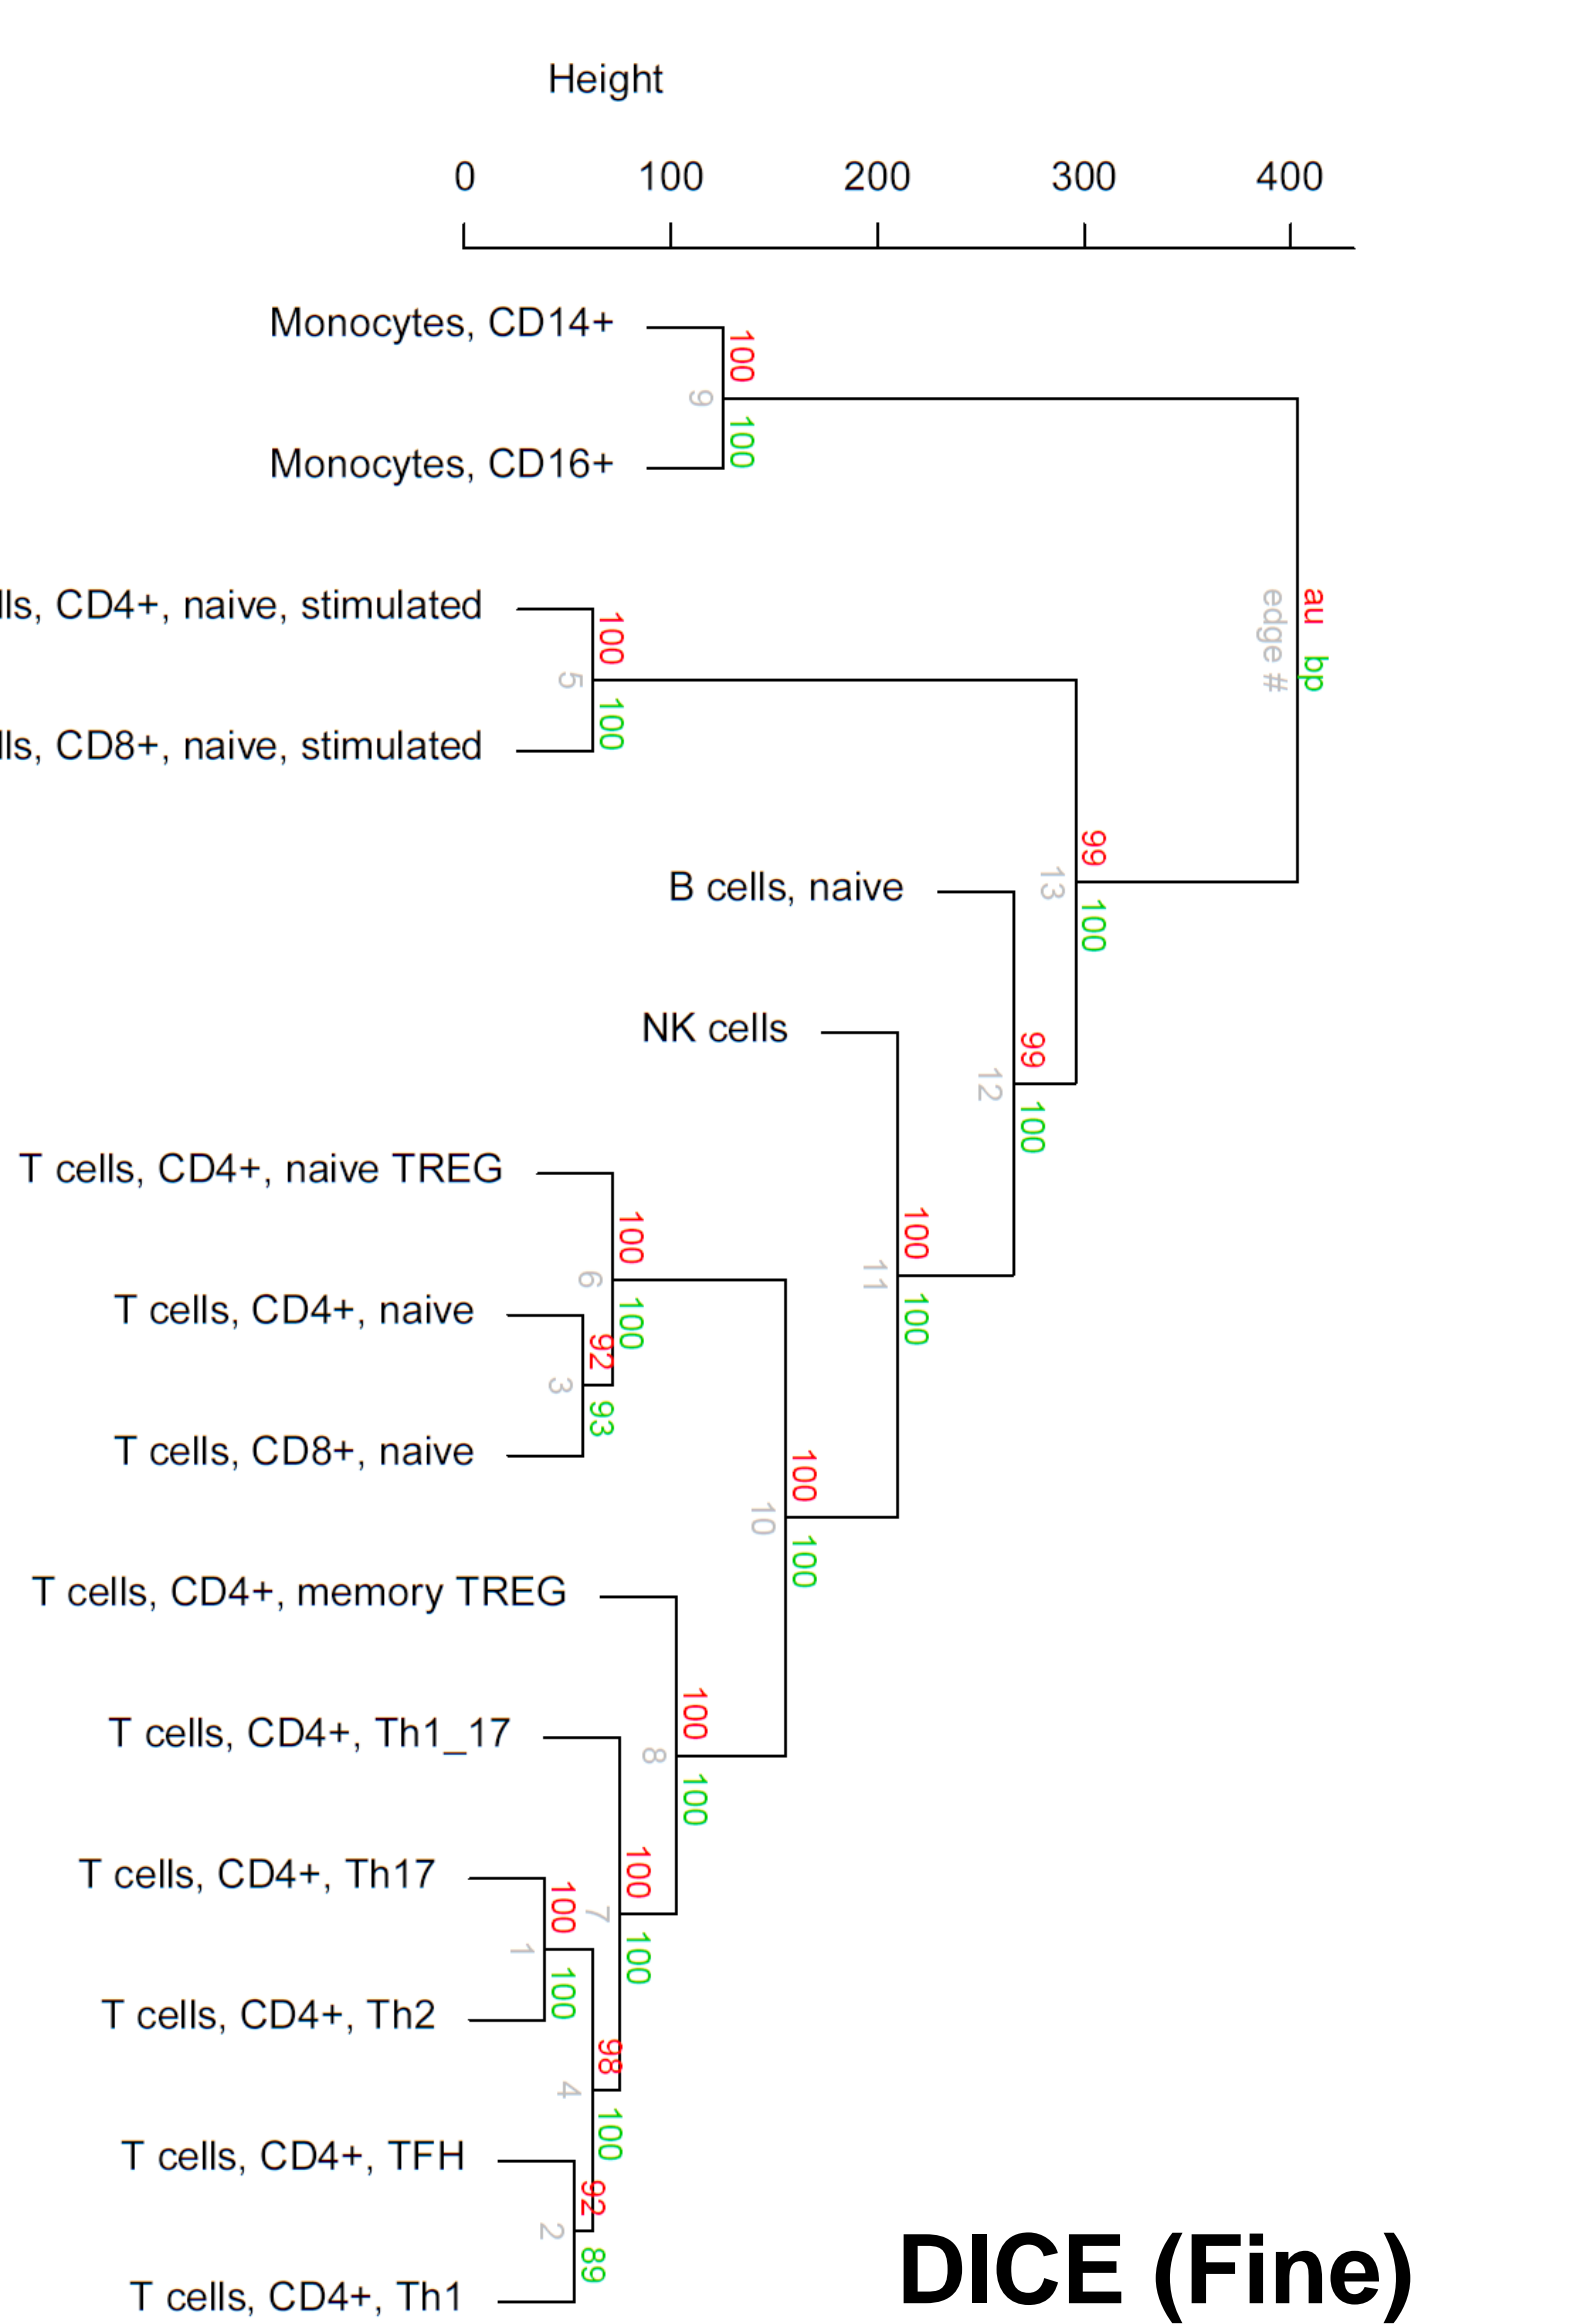

**DICE (Fine)**

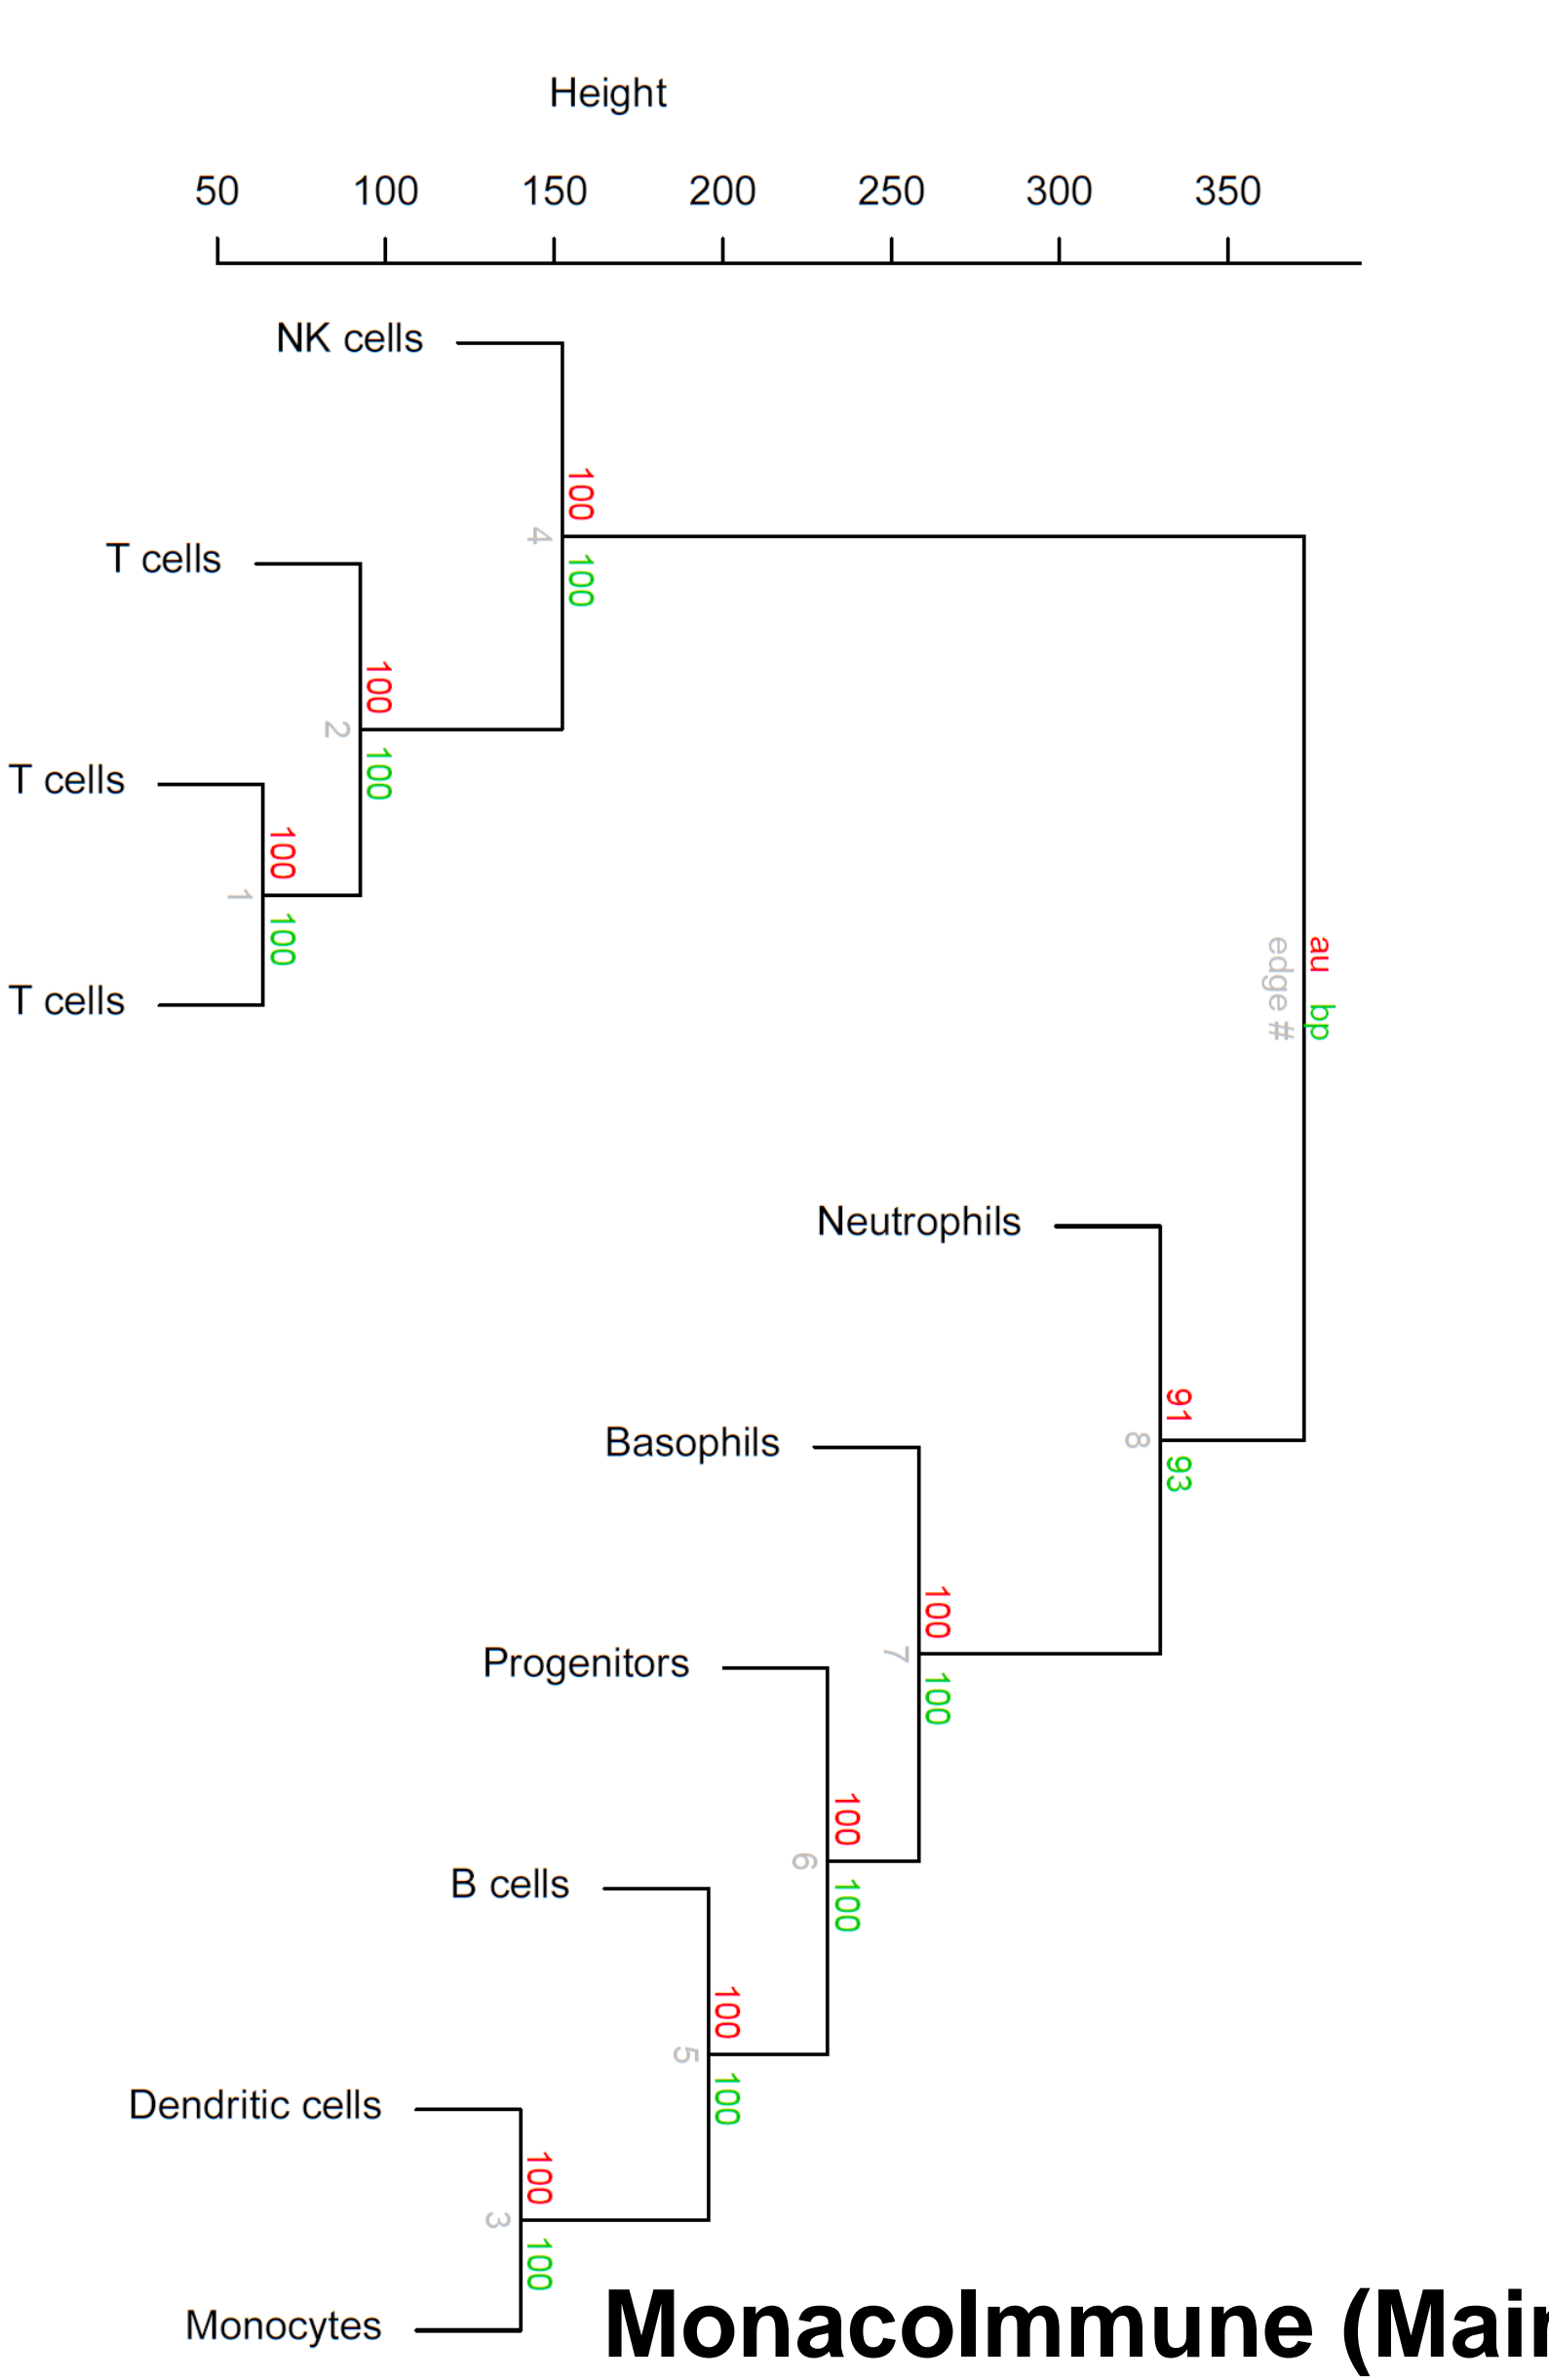

**Monoclimmune (Main)**

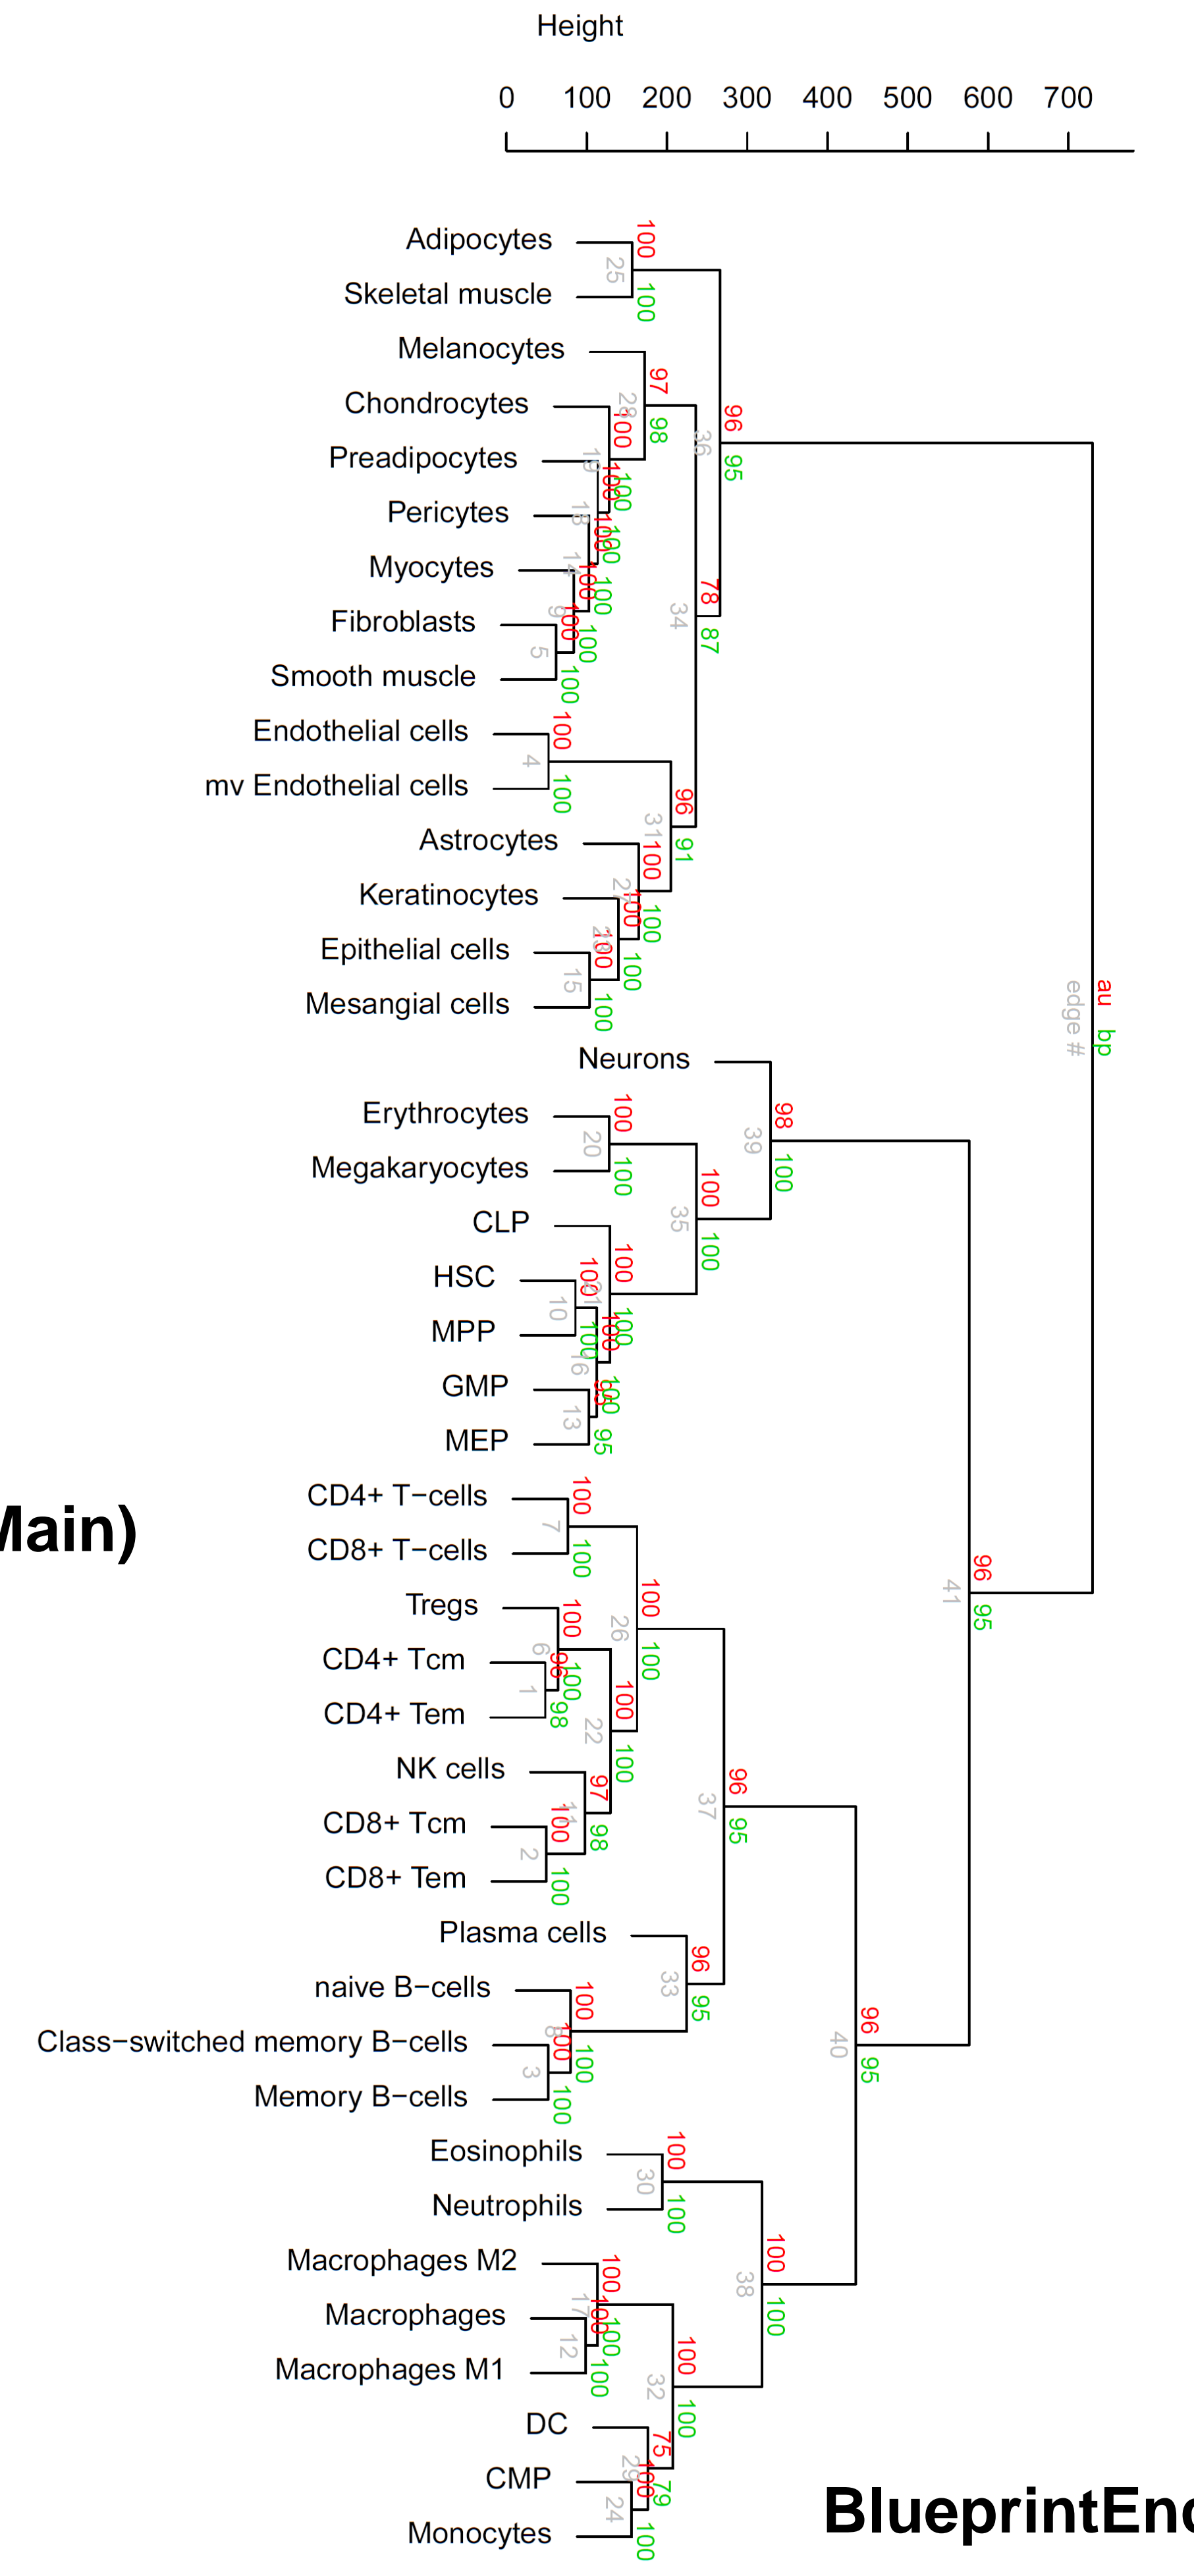

**BlueprintEncode (Fine)**

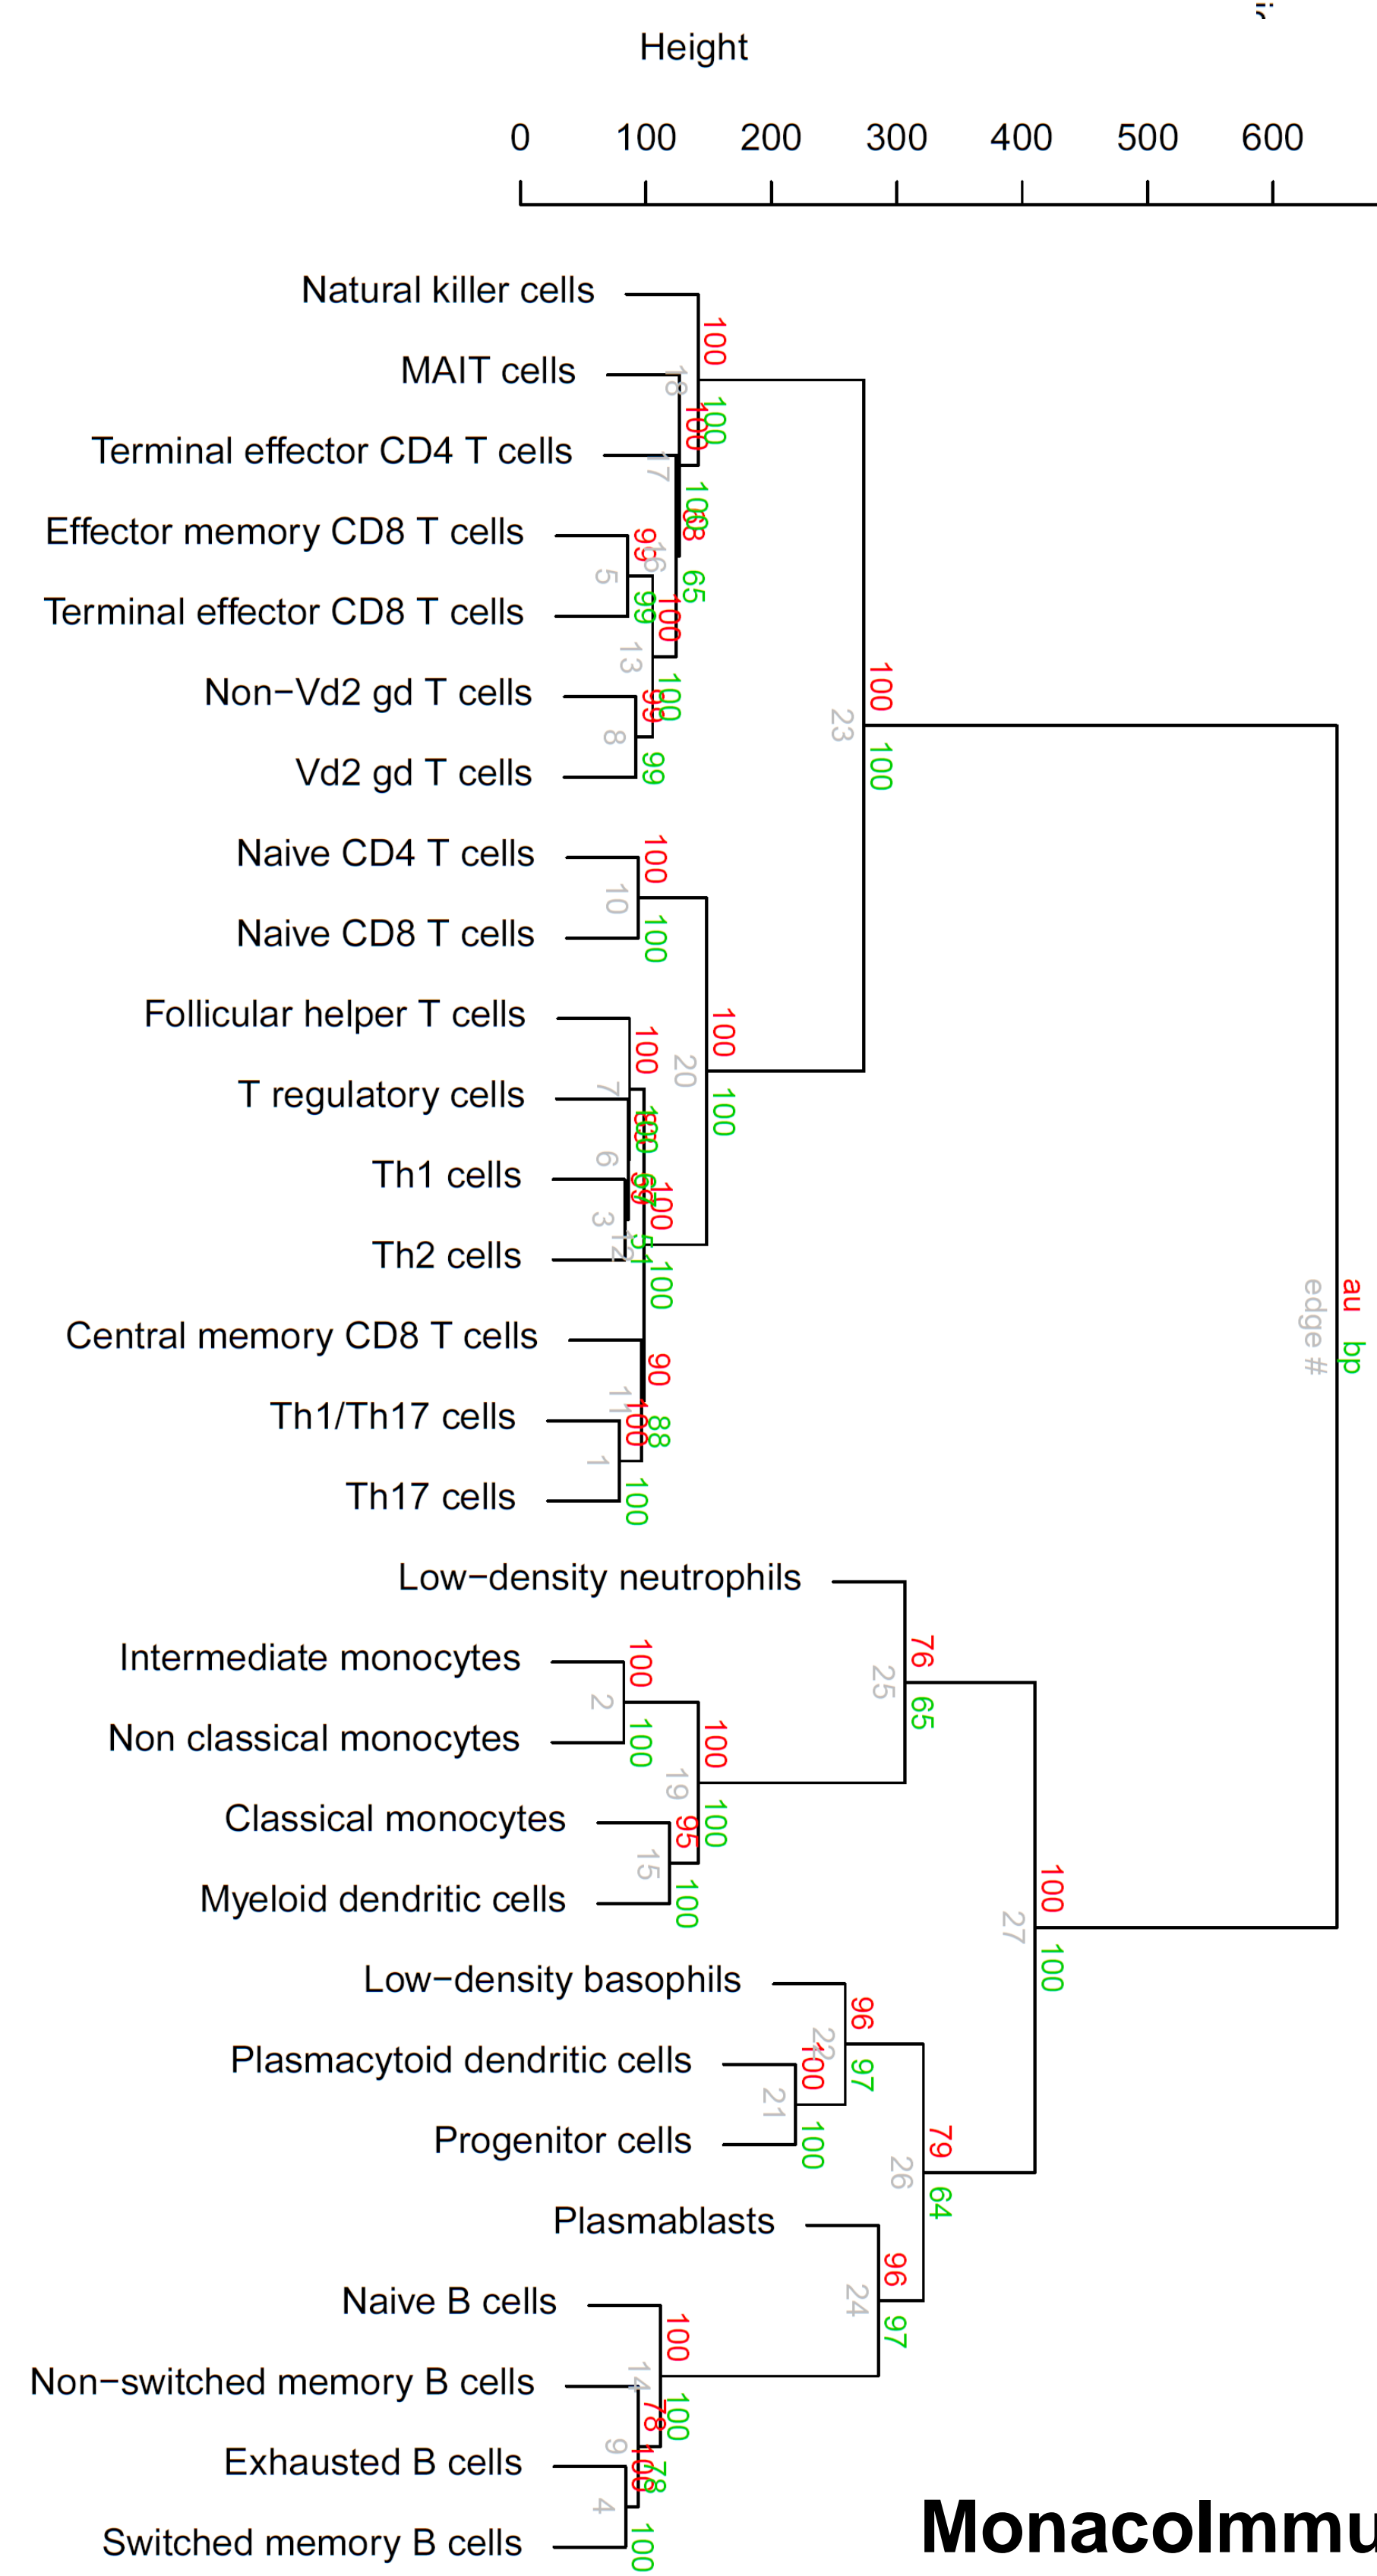

**Monoclimmune (Fine)**

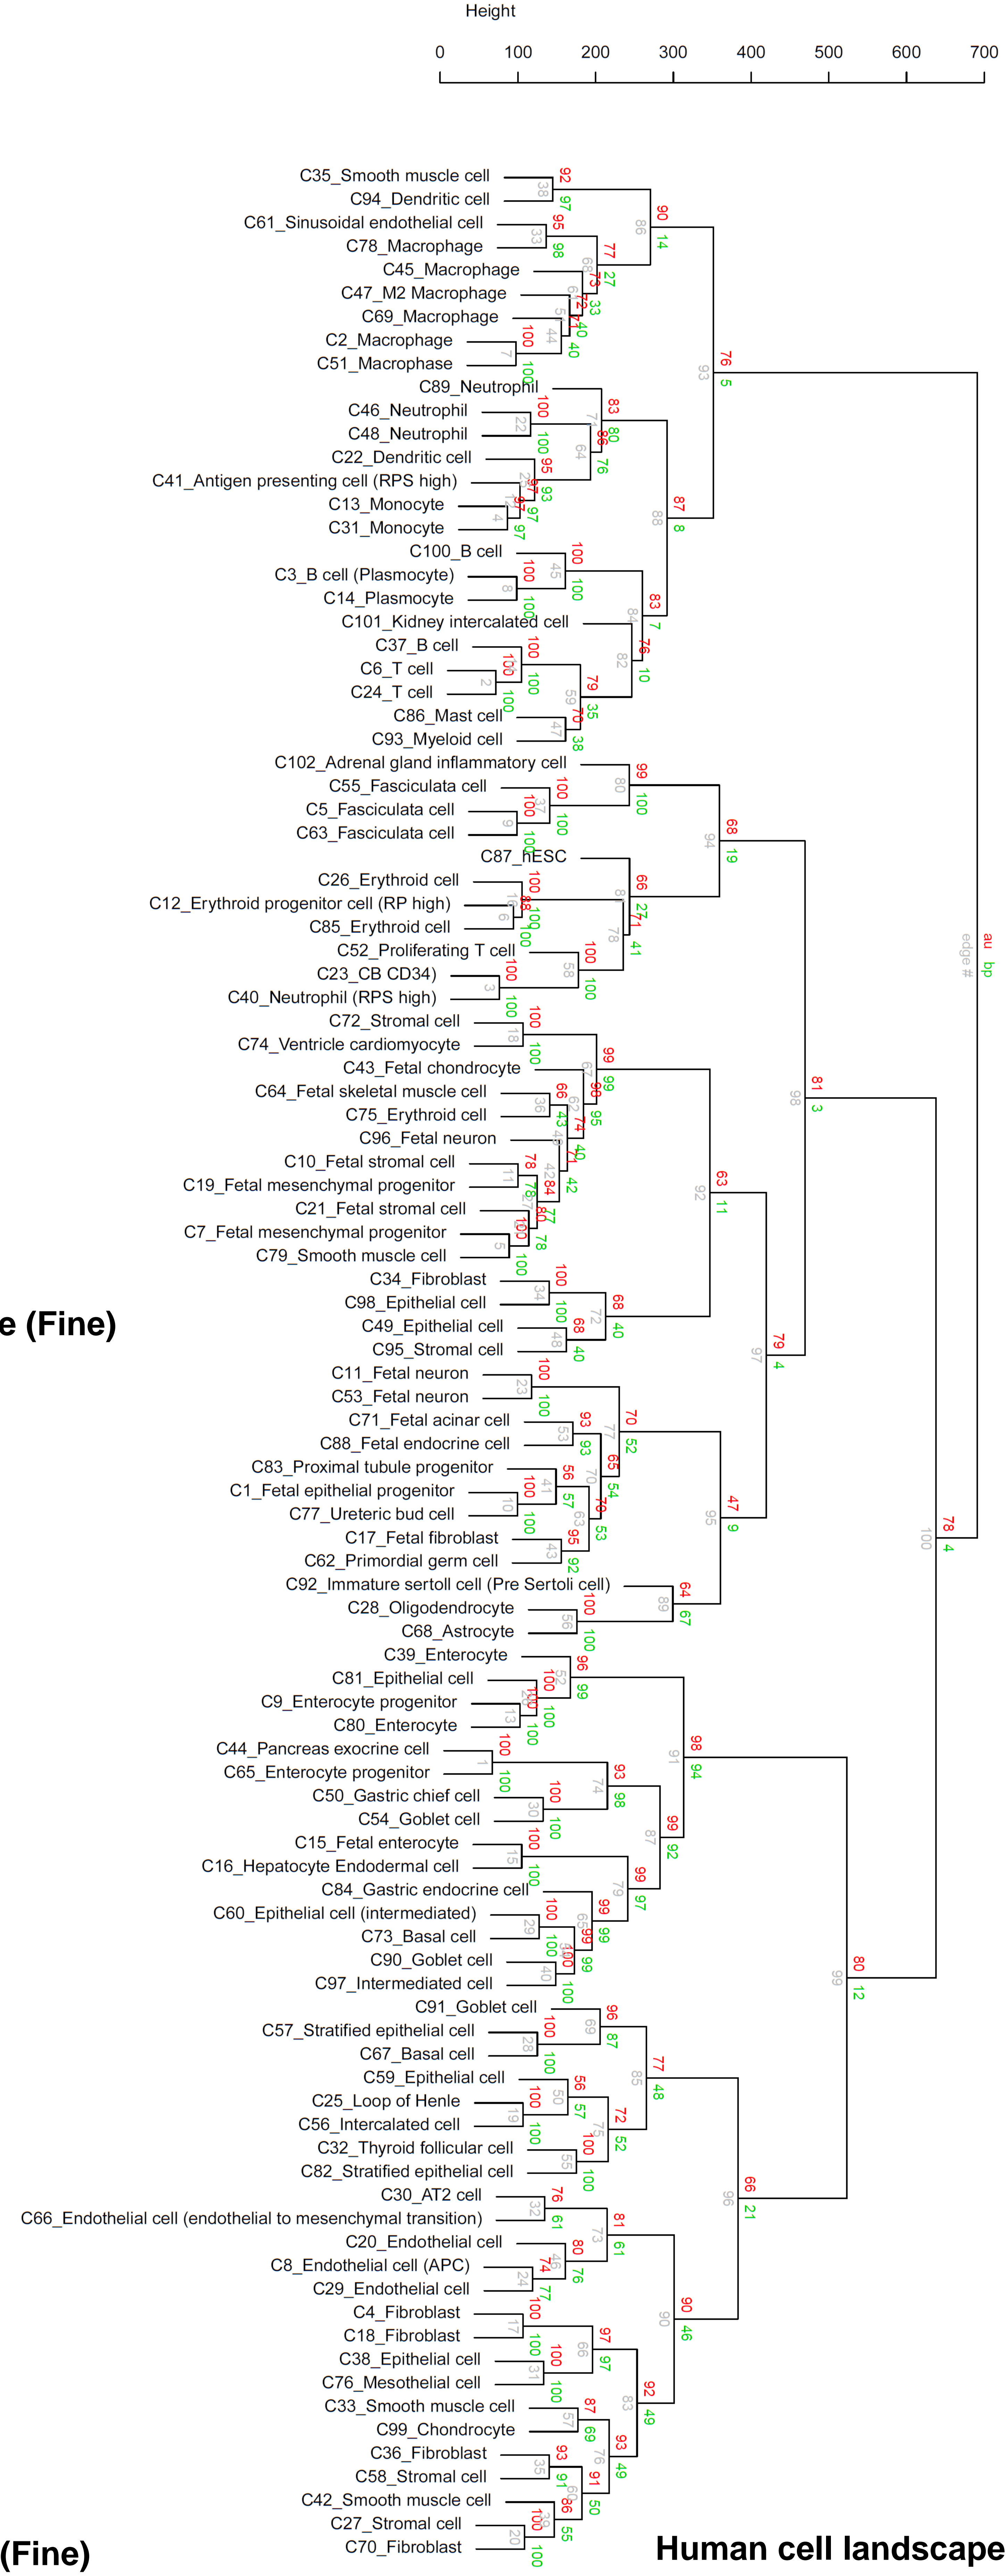

**Human cell landscape**

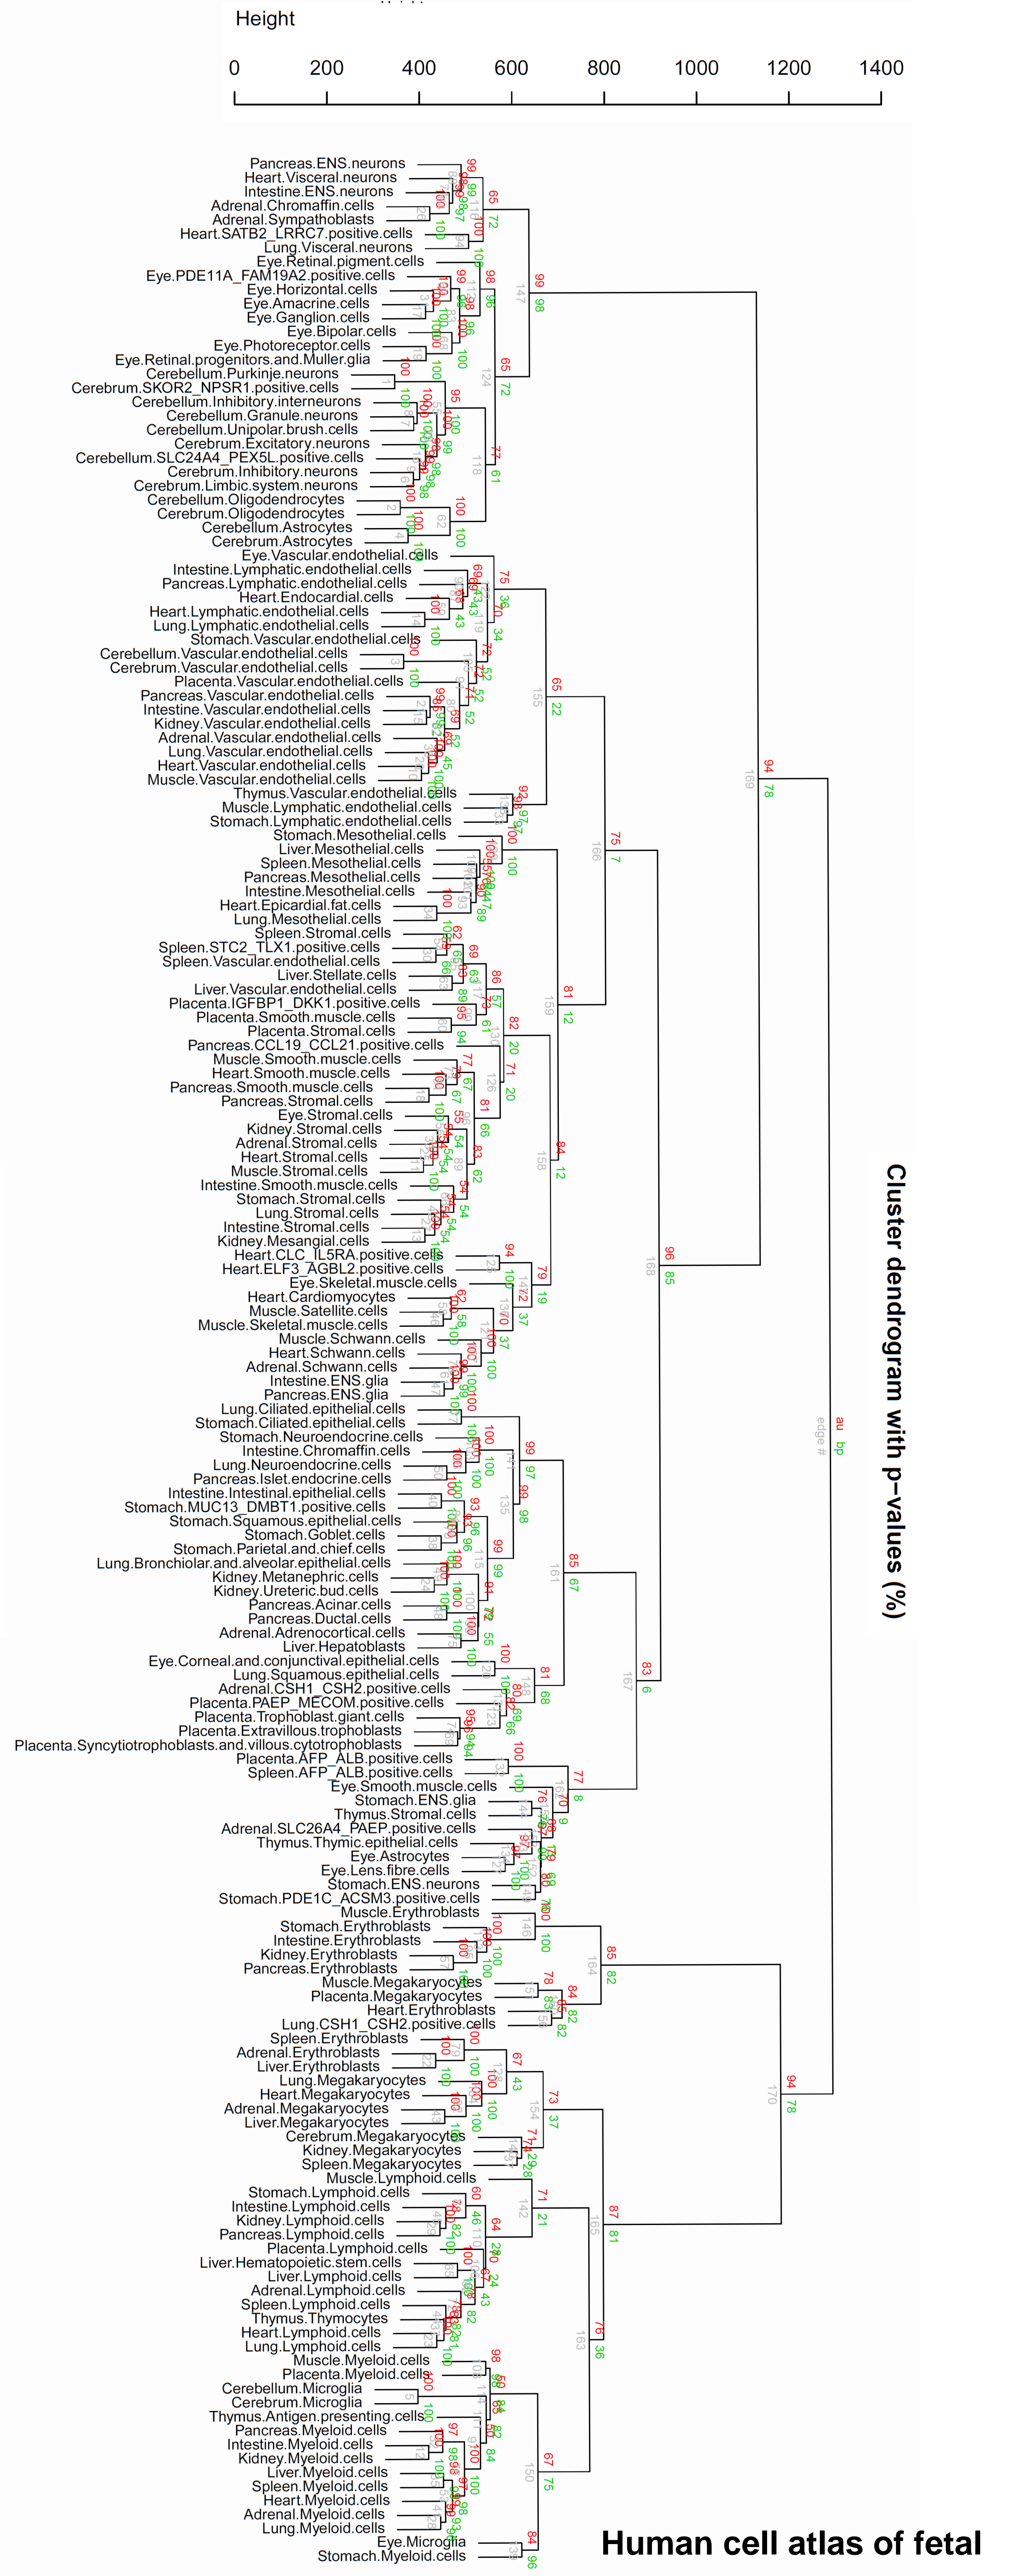

**Human cell atlas of fetal**

Cluster dendrogram with p-values (%)
