# Supplementary material for: deCS: A Tool for Systematic Cell Type Annotations of Single-cell RNA Sequencing Data among Human Tissues
Source: PubMed Central journal article supplement — Genomics Proteomics Bioinformatics. 2022 Apr 22;21(2):370–84. doi: 10.1016/j.gpb.2022.04.001 (PMC10626171; doi:10.1016/j.gpb.2022.04.001), 2022-04-22

**A**

## Union of top 30 marker genes of each cluster

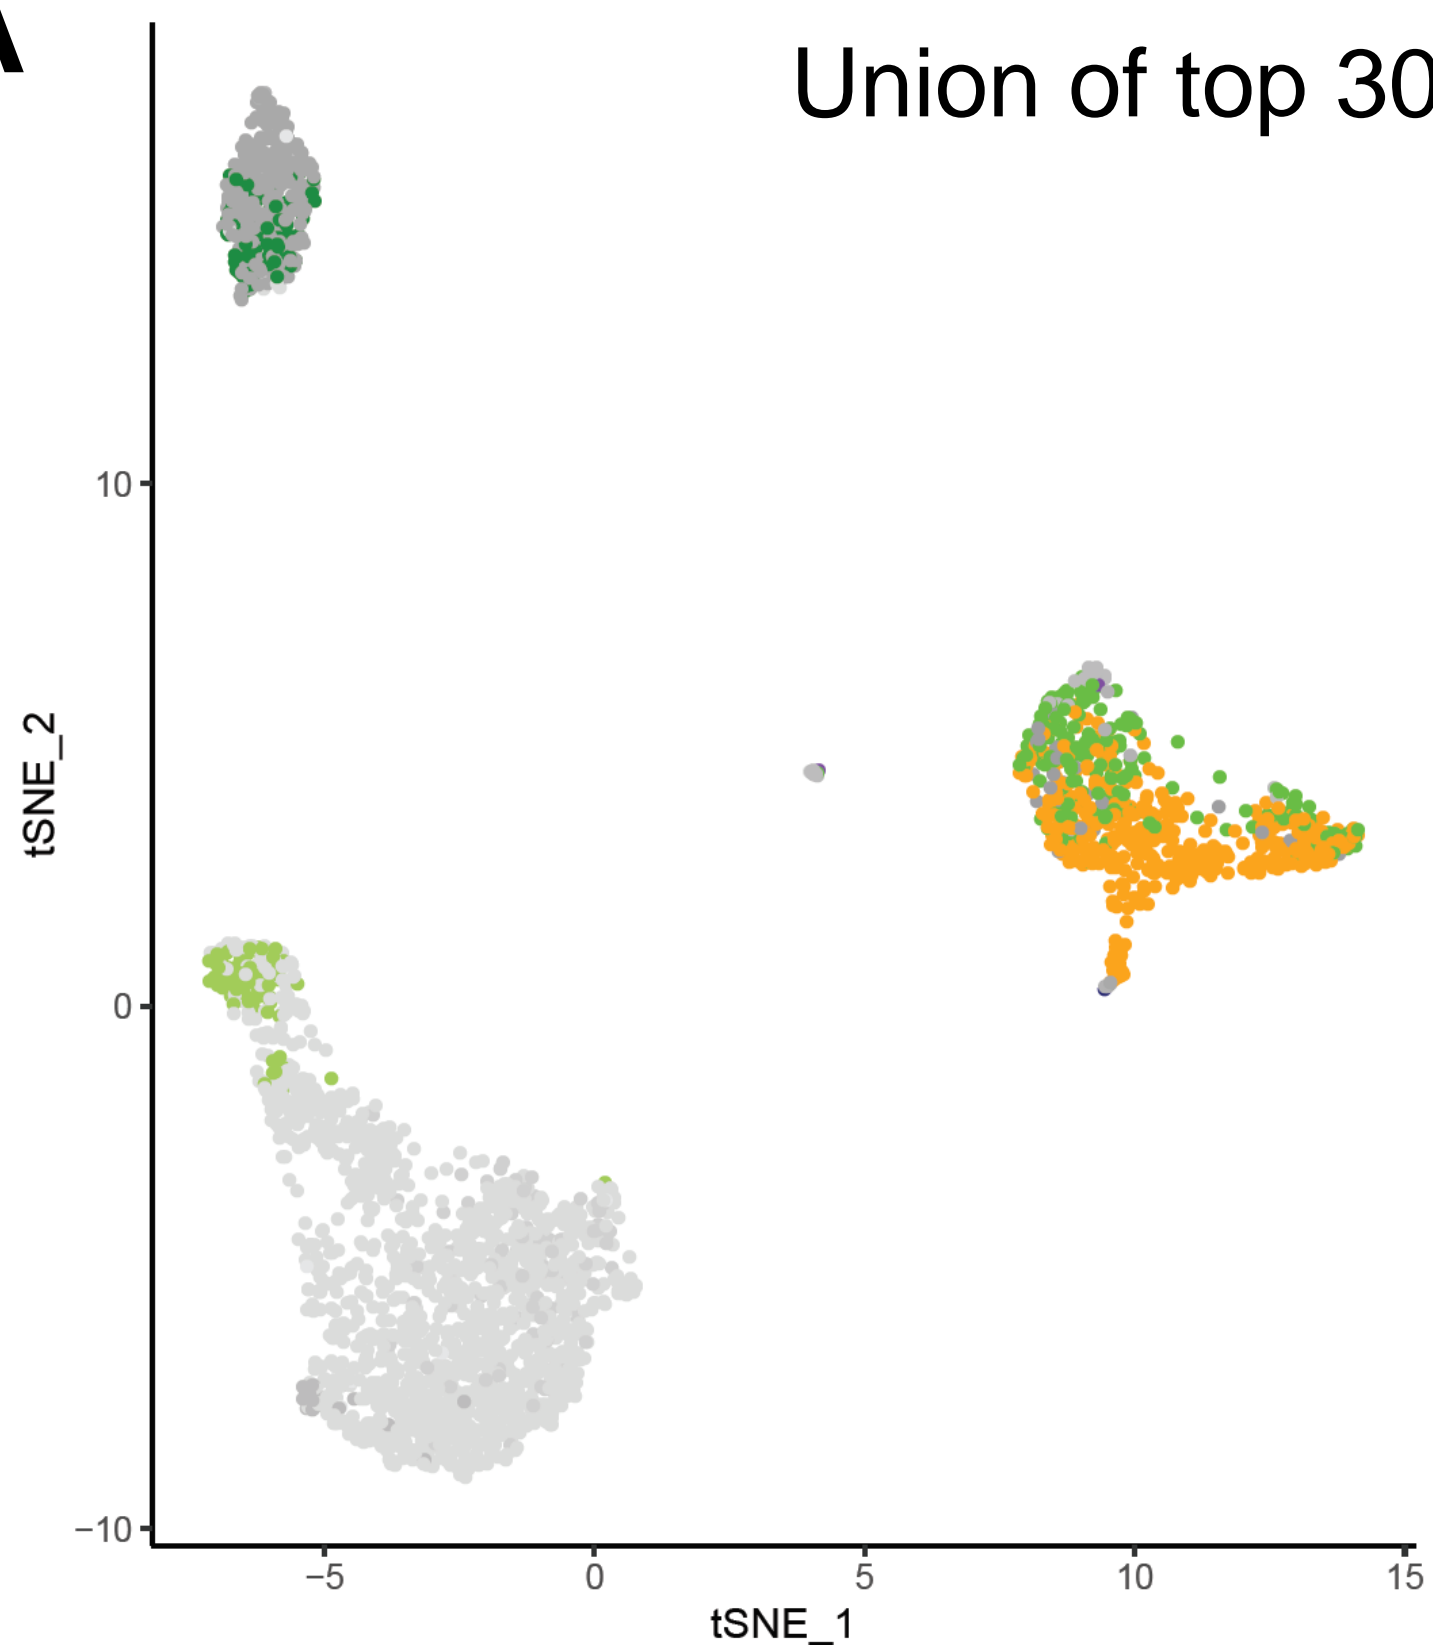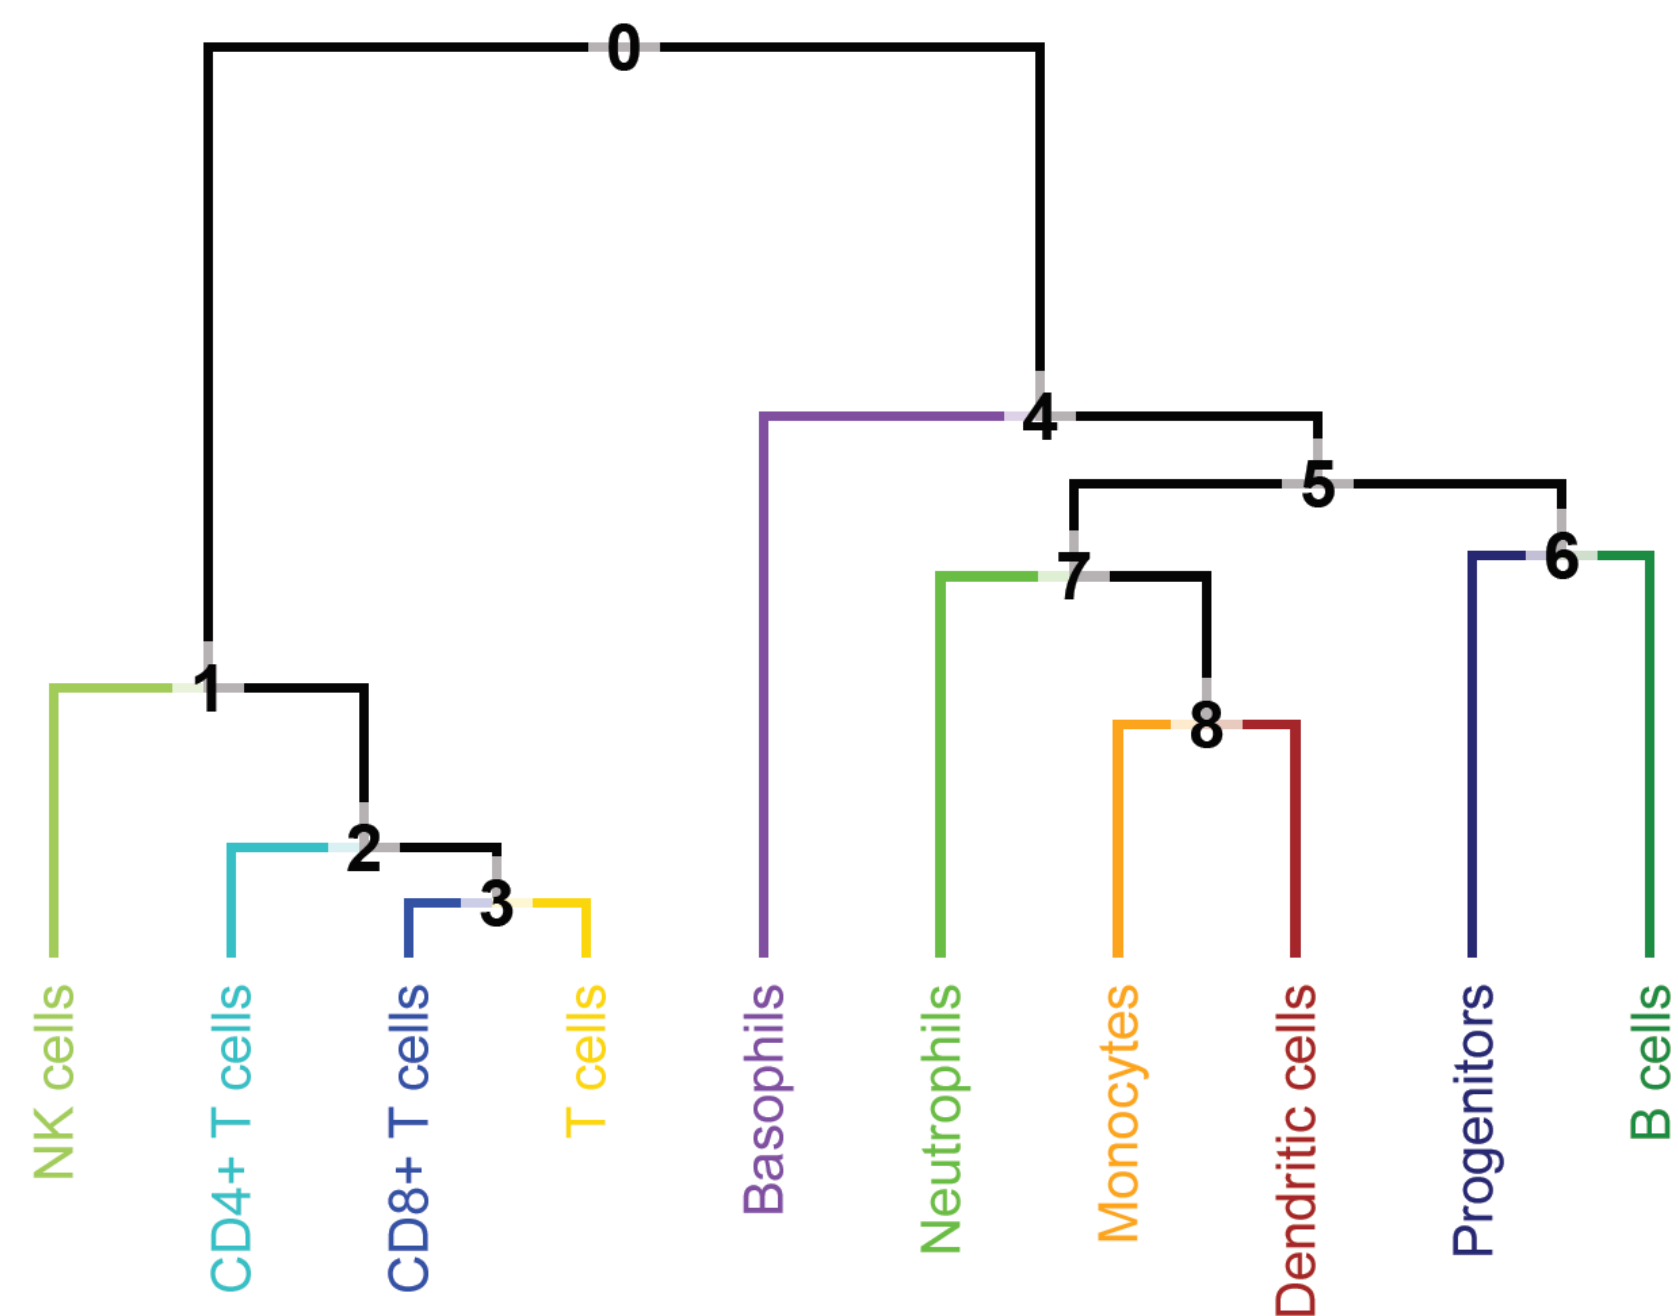**B**

## Top 2000 most variable genes

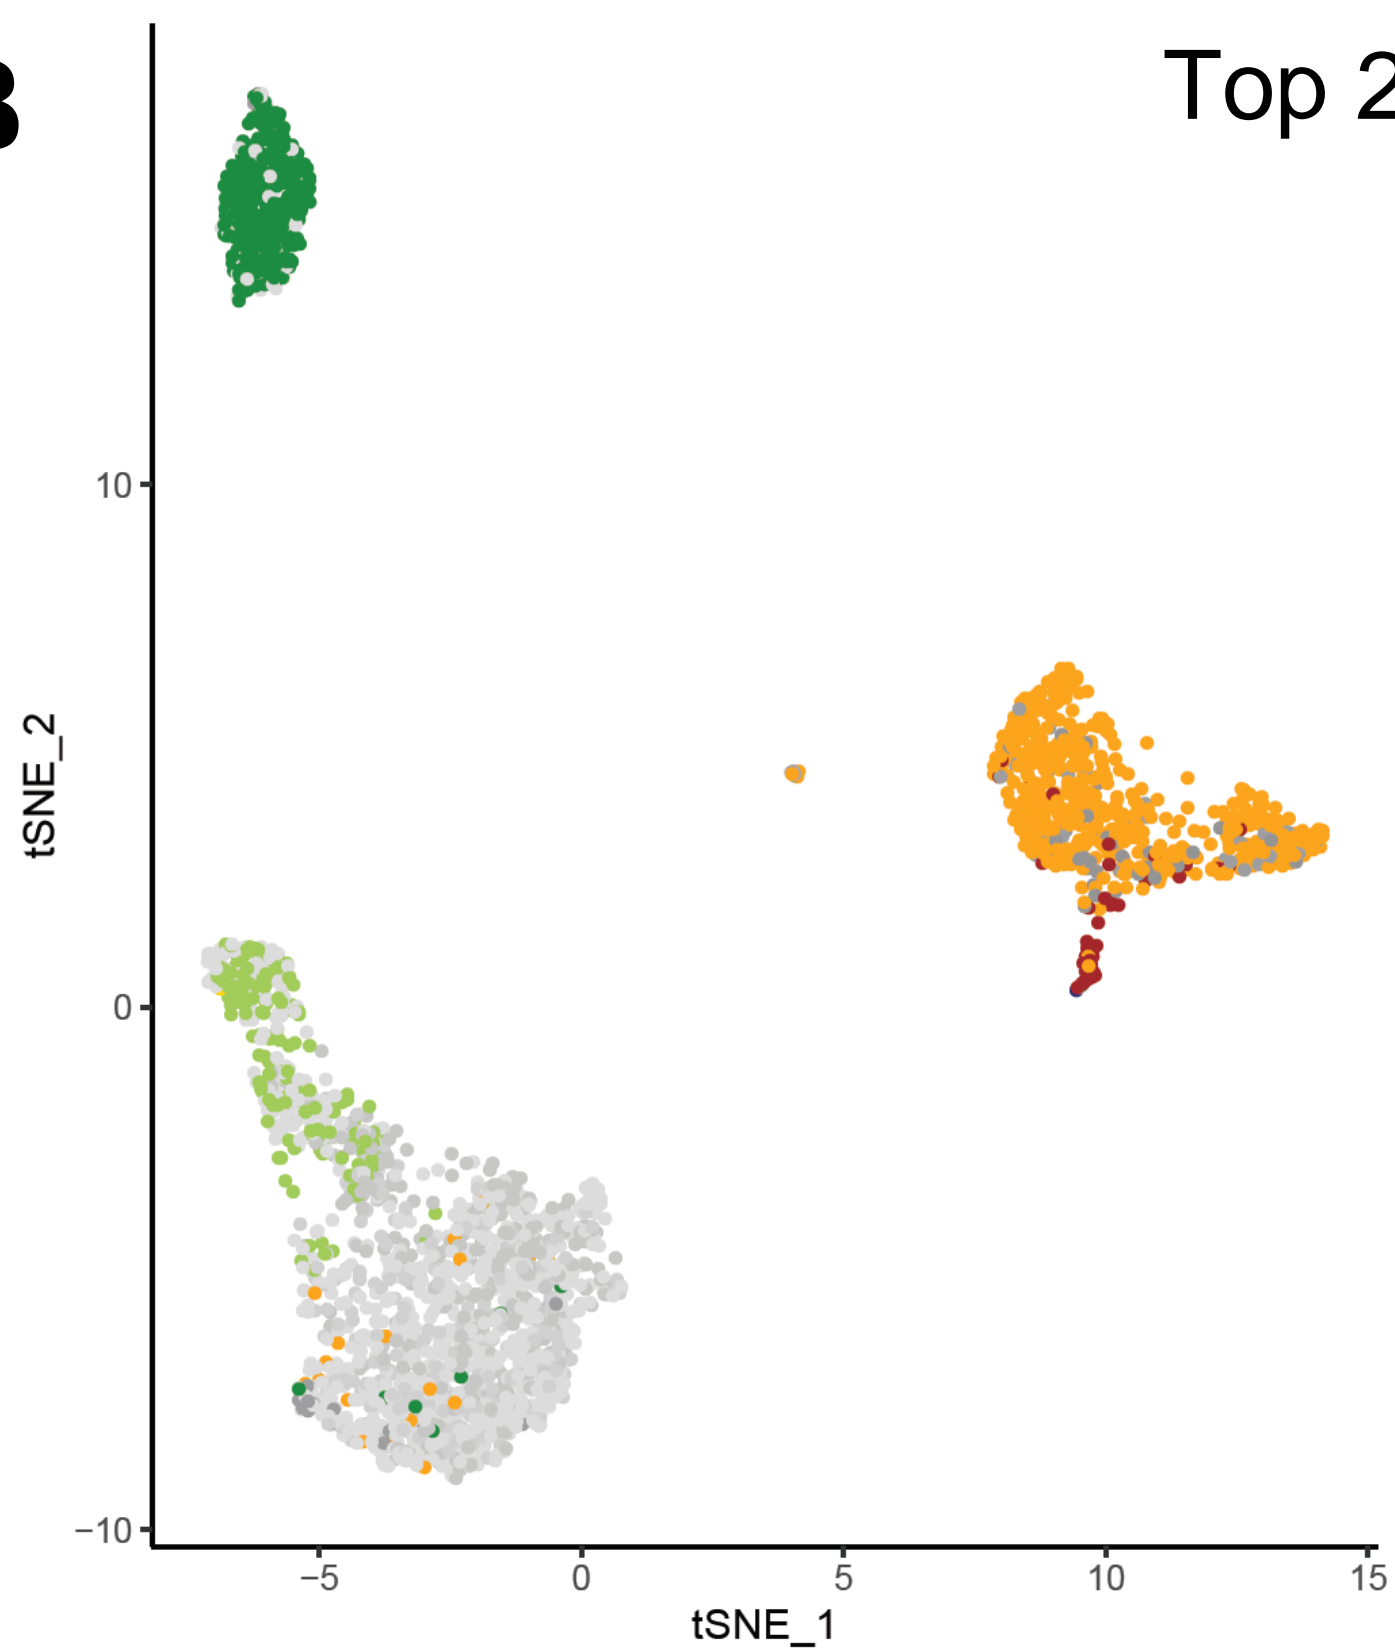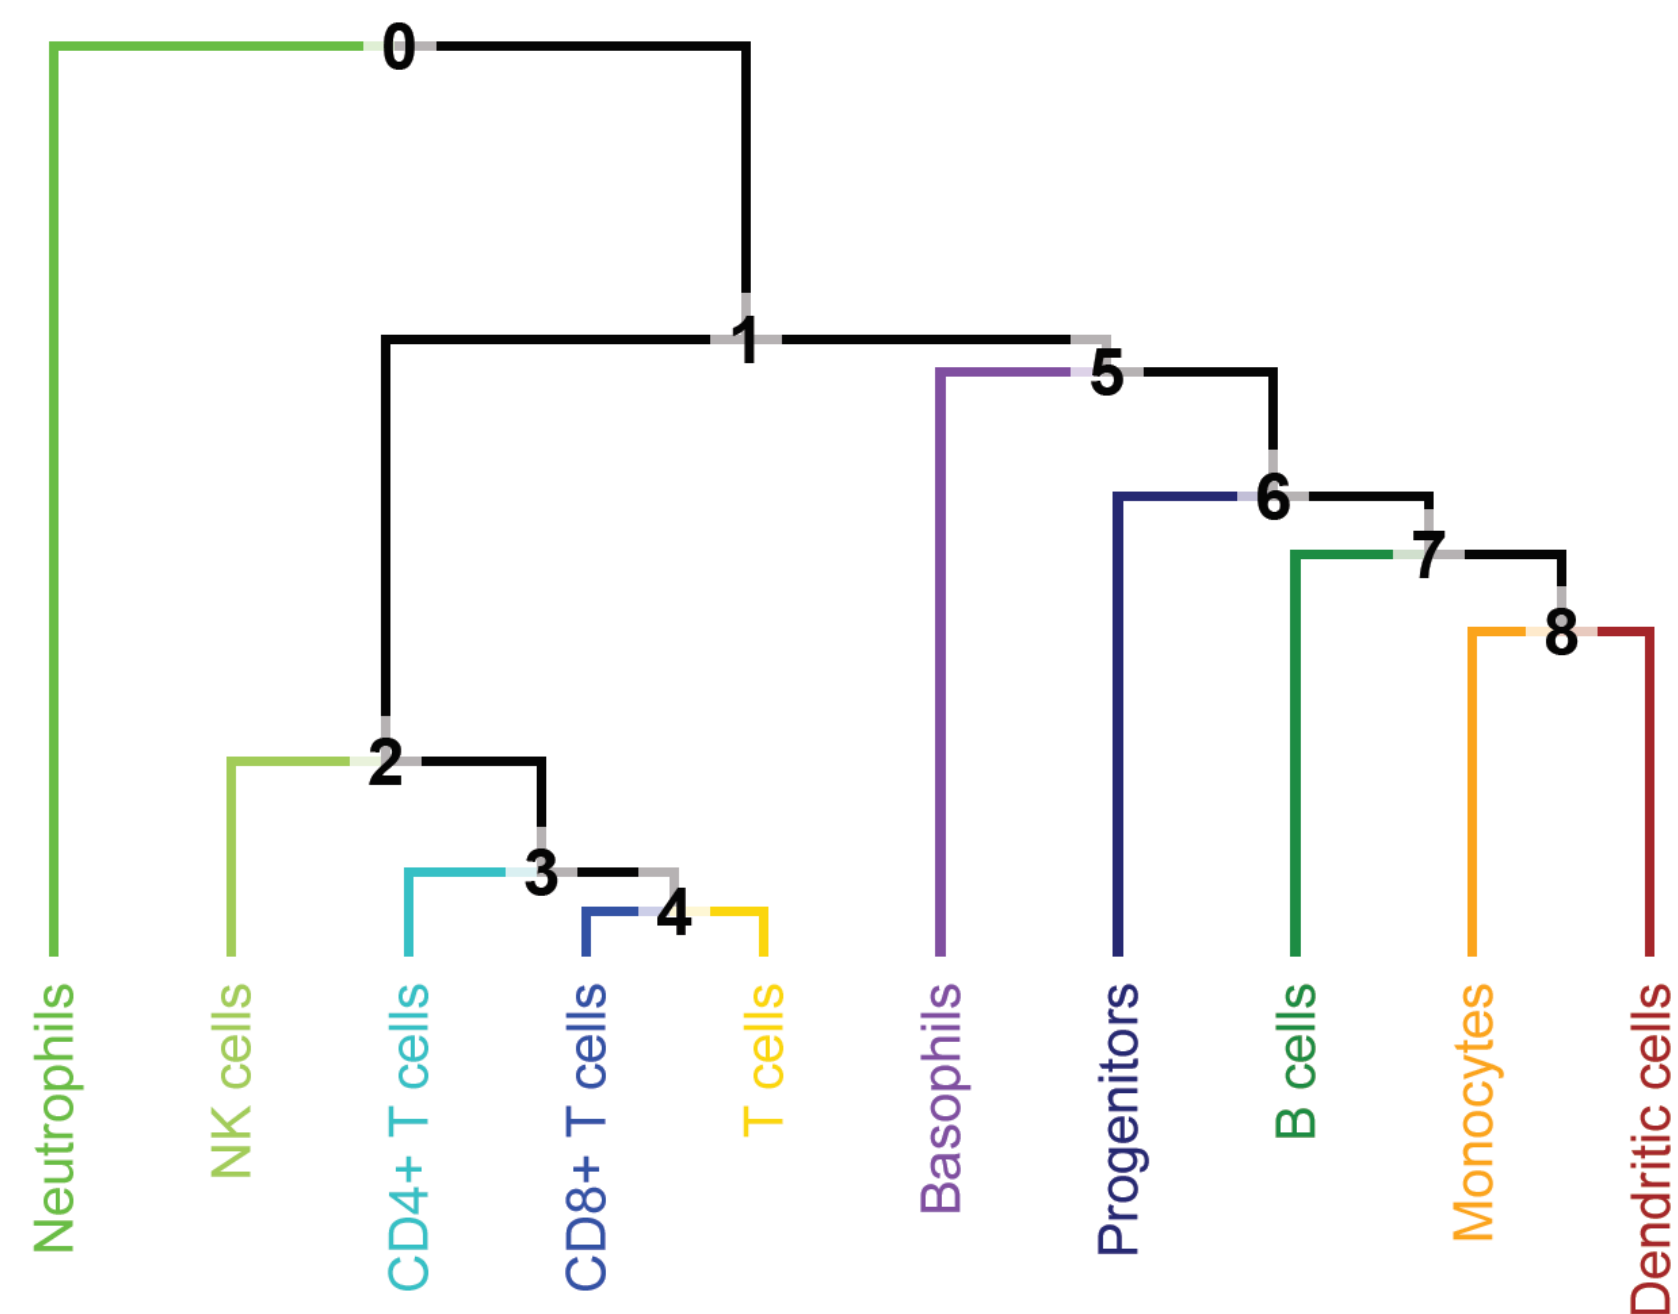**C**

## All detect genes

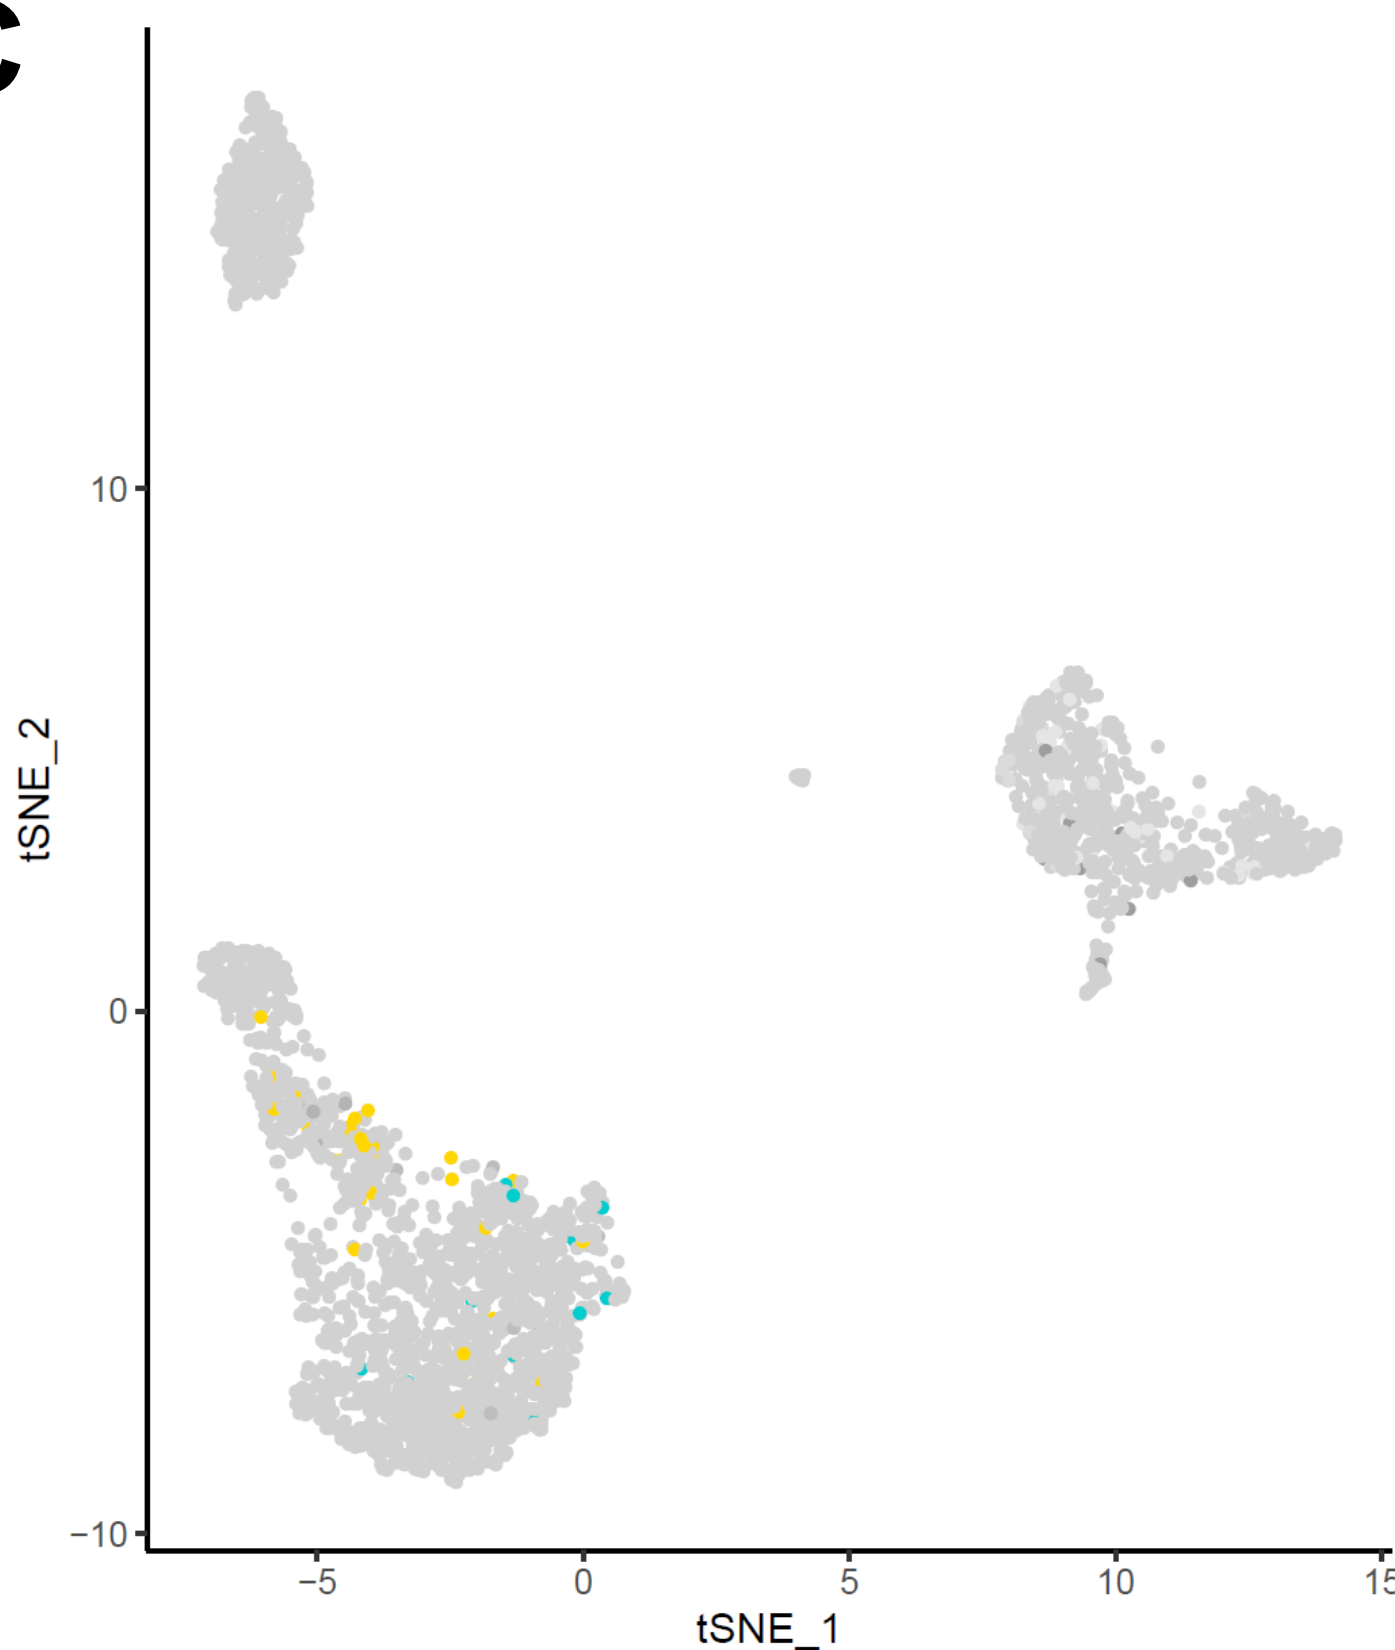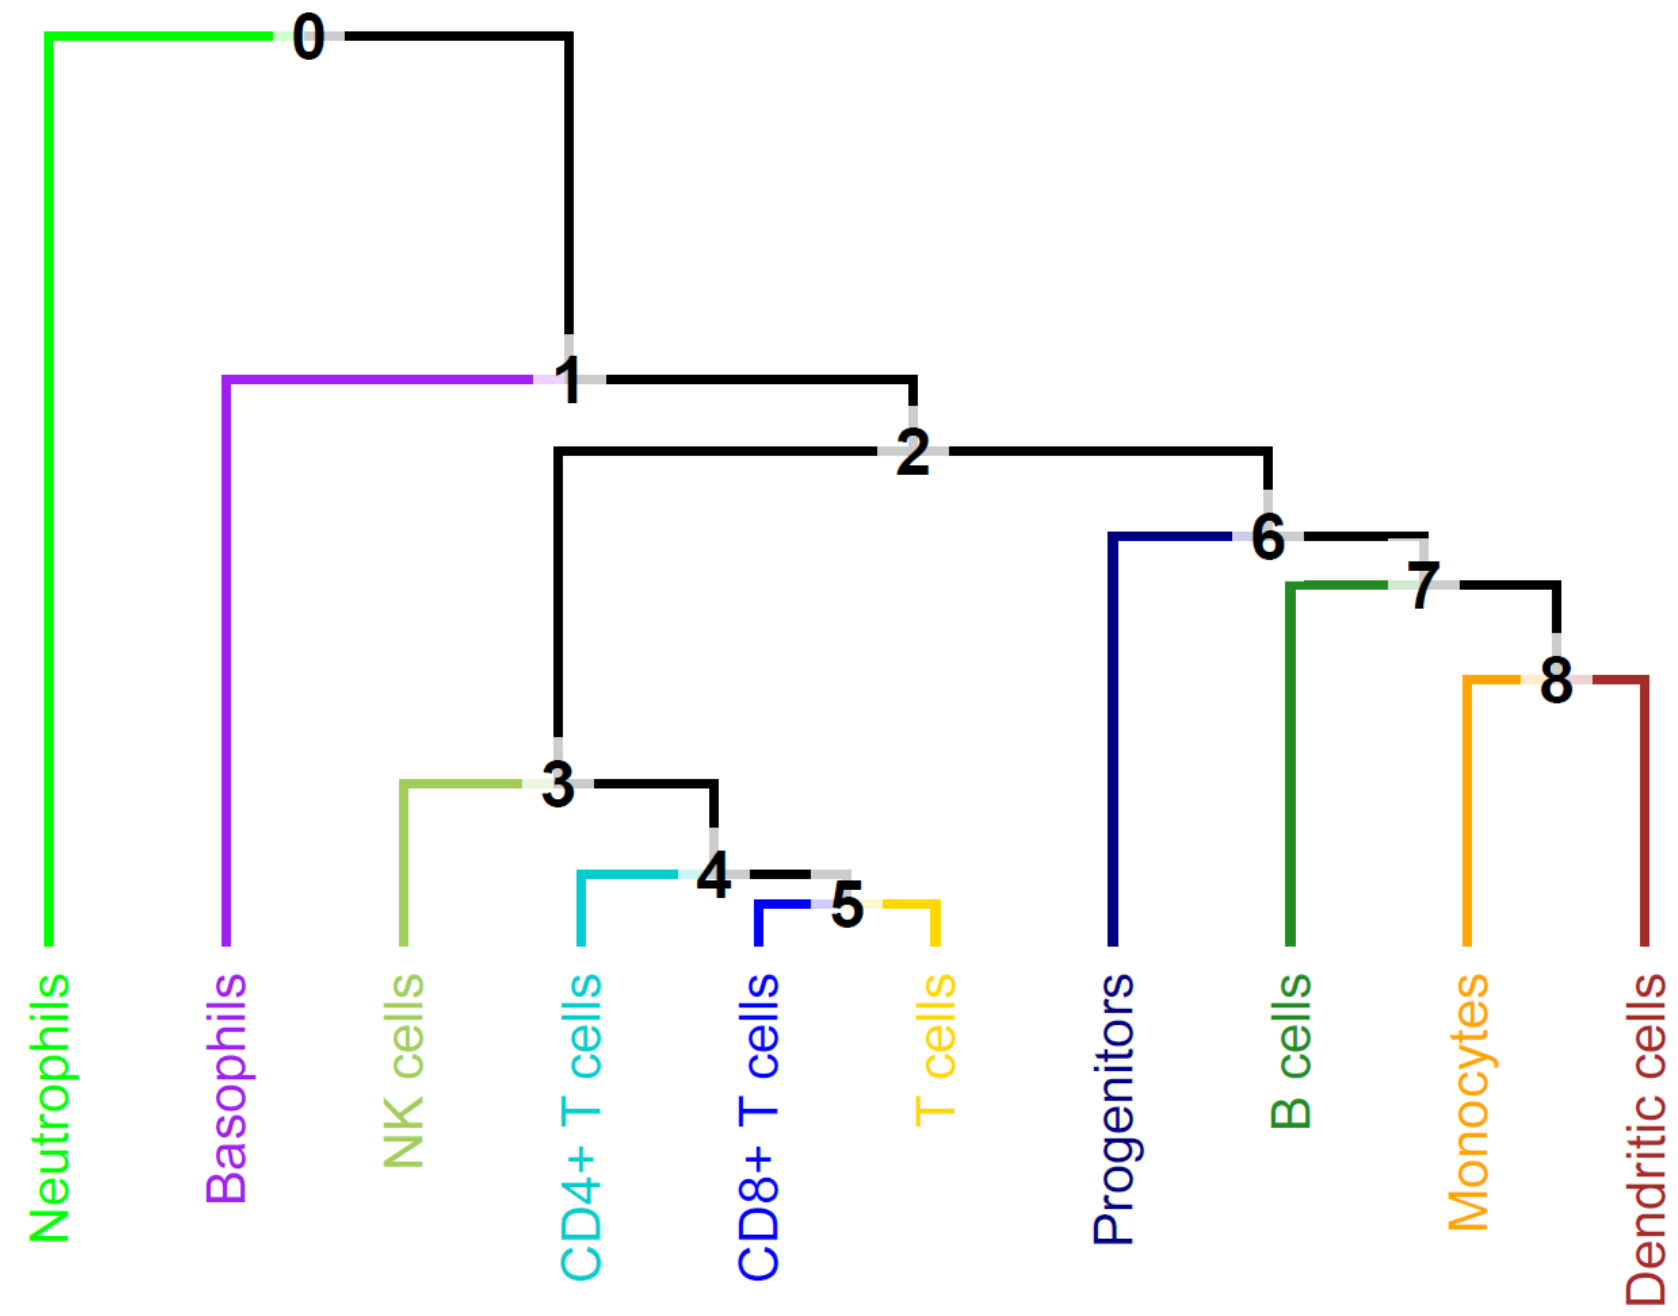

Supplement: mmc9.pdf [file mmc9.pdf]
